# Supplementary material for: Integration of transcriptome and metabolome analyses reveals sorghum roots responding to cadmium stress through regulation of the flavonoid biosynthesis pathway
Source: Front Plant Sci. 2023 Feb 23;14:1144265. doi: 10.3389/fpls.2023.1144265 (PMC9996021; doi:10.3389/fpls.2023.1144265)
Supplement: Supplementary Table 6 — Information about DEMs. [file Table_6.xlsx]

## Sheet: Sheet1
Index	Q1 (Da)	Q3 (Da)	Molecular weight (Da)	Formula	Ionization model	Compounds	物质	Class I	物质一级分类	Class II	物质二级分类	CAS	Level	CK-1	CK-2	CK-3	CD-1	CD-2	CD-3	QC01	QC02	QC03	cpd_ID	kegg_map	CK_vs_CD_VIP	CK_vs_CD_P-value	CK_vs_CD_Fold_Change	CK_vs_CD_Log2FC	CK_vs_CD_Type
Hajp006320	287.06	153.02	286.048	C15H10O6	[M+H]+	Luteolin (5,7,3',4'-Tetrahydroxyflavone)*	木犀草素*	Flavonoids	黄酮	Flavones	黄酮	491-70-3	1	279833	215823	222392	569187	573623	626990	391433	392653	392587	C01514	ko00941,ko00944,ko01100,ko01110	1.26084	0.000230028	2.46474	1.30143	up
pme0026	147.11	84.08	146.106	C6H14N2O2	[M+H]+	L-Lysine	L-赖氨酸	Amino acids and derivatives	氨基酸及其衍生物	Amino acids and derivatives	氨基酸及其衍生物	56-87-1	3	1.80401e+06	1.86685e+06	1.809e+06	738543	858243	869318	1.36988e+06	1.36896e+06	1.36173e+06	C00047	ko00300,ko00310,ko00470,ko00780,ko00960,ko00970,ko01100,ko01110,ko01210,ko01230,ko02010	1.27271	0.000281163	0.450031	-1.1519	down
pme3475	273.08	153.02	272.068	C15H12O5	[M+H]+	Butin; 7,3',4'-Trihydroxyflavanone*	紫铆素*	Flavonoids	黄酮	Flavanones	二氢黄酮	492-14-8	1	2.59521e+07	1.54612e+07	1.39718e+07	4.45157e+07	4.56301e+07	4.18772e+07	2.82761e+07	2.80821e+07	2.82046e+07	C09614	ko00941	1.18094	0.0150632	2.38373	1.25322	up
Lmyn006227	269.05	151	270.053	C15H10O5	[M-H]-	Galangin (3,5,7-Trihydroxyflavone)	高良姜素	Flavonoids	黄酮	Flavones	黄酮	548-83-4	3	5.9885e+06	4.97428e+06	5.28488e+06	2.7242e+07	2.78601e+07	3.02569e+07	1.66807e+07	1.67909e+07	1.66789e+07	C10044	ko00941	1.28046	0.000624551	5.25361	2.39331	up
pme0519	341.11	119.03	342.116	C12H22O11	[M-H]-	D-Sucrose*	D-蔗糖*	Others	其它类	Saccharides	糖类	57-50-1	1	3.62468e+06	3.72404e+06	4.38113e+06	1.15454e+07	1.18709e+07	1.09776e+07	6.08797e+06	6.06892e+06	6.03676e+06	C00089	ko00052,ko00500,ko01100,ko01110,ko02010	1.27529	3.01915e-05	2.93216	1.55197	up
pme1201	273.08	167.03	274.084	C15H14O5	[M-H]-	Phloretin	根皮素	Flavonoids	黄酮	Chalcones	查耳酮	60-82-2	3	349197	332022	319983	791088	777024	903057	502360	497280	499420	C00774	ko00941,ko01110	1.27524	0.00493625	2.4682	1.30346	up
pme1662	287.09	167.03	286.084	C16H14O5	[M+H]+	5,4'-Dihydroxy-7-methoxyflavanone (Sakuranetin)	5,4'-二羟基-7-甲氧基黄酮 (樱花素)	Flavonoids	黄酮	Flavanones	二氢黄酮	2957-21-3	3	241197	281127	329259	880021	1.04298e+06	1.00977e+06	643785	647820	650540	C09833	ko00941,ko01110	1.26664	0.00115947	3.4439	1.78404	up
Hmhp001812	282.12	136.06	281.112	C11H15N5O4	[M+H]+	2'-O-Methyladenosine	2-甲氧基腺苷	Nucleotides and derivatives	核苷酸及其衍生物	Nucleotides and derivatives	核苷酸及其衍生物	2140-79-6	1	7.54646e+06	7.72682e+06	7.60164e+06	2.47314e+07	2.21966e+07	2.36739e+07	16007313	1.60407e+07	1.61831e+07	-	-	1.28206	0.00203304	3.08643	1.62594	up
Lmbn004685	311.22	223.17	312.23	C18H32O4	[M-H]-	5S,8R-DiHODE; (5S,8R,9Z,12Z)-5,8-Dihydroxyoctadeca-9,12-dienoate	5,8-二羟基-9,12-十八碳二烯酸	Lipids	脂质	Free fatty acids	游离脂肪酸	-	3	4.76365e+06	4.67129e+06	4.84203e+06	1.00929e+07	1.01839e+07	1.01289e+07	7.14789e+06	7.17176e+06	7.08206e+06	C20186	ko00591	1.28363	1.99244e-06	2.12971	1.09065	up
mws0914	271.06	151	272.068	C15H12O5	[M-H]-	3,5,7-Trihydroxyflavanone (Pinobanksin)	3,5,7-三羟基黄烷酮 (短叶松素)	Flavonoids	黄酮	Flavanonols	二氢黄酮醇	548-82-3	1	6.5459e+06	6.4506e+06	5.60603e+06	1.99543e+07	2.11953e+07	2.23482e+07	1.23941e+07	1.22131e+07	1.23195e+07	C09826	ko00941	1.27833	0.000501688	3.41339	1.77121	up
MWSmce455	181.05	107.01	182.058	C9H10O4	[M-H]-	Vanillic acid methyl ester	香草酸甲酯	Phenolic acids	酚酸类	Phenolic acids	酚酸类	3943-74-6	3	1.40565e+06	1.55424e+06	1.41729e+06	517269	488153	477796	873141	875008	886384	-	-	1.28067	0.00147752	0.338852	-1.56127	down
mws1038	277.12	146.08	278.13	C11H22N2O4S	[M-H]-	Pantetheine	泛酰巯基乙胺	Alkaloids	生物碱	Alkaloids	生物碱	496-65-1	1	849260	863655	843099	2.38813e+06	2.77212e+06	2.75969e+06	1.80222e+06	1.77976e+06	1.80758e+06	C00831	ko00770,ko01100,ko01110	1.27935	0.00484728	3.09855	1.63159	up
Zmhn002227	385.11	223.06	386.121	C17H22O10	[M-H]-	4-O-Glucosyl-sinapate	4-O-葡萄糖基芥子酸	Phenolic acids	酚酸类	Phenolic acids	酚酸类	-	3	1.71204e+06	1.59301e+06	1.65678e+06	3.96523e+06	3.74335e+06	4.04097e+06	3.20673e+06	3.25329e+06	3.26501e+06	C02919	-	1.28083	0.000435803	2.36798	1.24366	up
MWSHY0137	273.08	153.02	272.068	C15H12O5	[M+H]+	Naringenin (5,7,4'-Trihydroxyflavanone)*	柚皮素*	Flavonoids	黄酮	Flavanones	二氢黄酮	480-41-1	1	1.33593e+07	1.32024e+07	1.25449e+07	3.89492e+07	3.87299e+07	4.33241e+07	2.33013e+07	2.29754e+07	2.34064e+07	C00509	ko00941,ko01100,ko01110	1.28082	0.00240022	3.09419	1.62956	up
Xmyp004678	727.21	287.05	726.201	C32H38O19	[M+H]+	Kaempferol-3-O-(2-O-Xylosyl-6-O-Rhamnosyl)Glucoside	山柰酚-3-O-(2''-O-木糖基-6''-O-鼠李糖基)葡萄糖苷	Flavonoids	黄酮	Flavonols	黄酮醇	-	3	9316.13	890.235	7371.7	63430.1	51048.4	54306.2	37555.3	38118.6	37388.1	-	-	1.11776	0.000680392	9.60201	3.26334	up
mws1397	441.08	169.02	442.09	C22H18O10	[M-H]-	Epicatechin gallate*	表儿茶素没食子酸酯*	Flavonoids	黄酮	Flavanols	黄烷醇类	1257-08-5	1	304687	352462	301689	68724	106734	61941.6	191649	192692	195494	-	-	1.24729	0.000424144	0.247591	-2.01397	down
pmb2591	245.09	203.08	246.1	C13H14N2O3	[M-H]-	N-Acetyl-L-Tryptophan	N-乙酰-L-色氨酸	Amino acids and derivatives	氨基酸及其衍生物	Amino acids and derivatives	氨基酸及其衍生物	1218-34-4	1	387176	304181	304073	1.32694e+06	1.32528e+06	1.45396e+06	725831	712615	725929	-	-	1.27486	0.000105056	4.12503	2.04441	up
pme2459	449.11	287.06	448.101	C21H20O11	[M+H]+	Luteolin-7-O-glucoside (Cynaroside)	木犀草素-7-O-葡萄糖苷 (木犀草苷)	Flavonoids	黄酮	Flavones	黄酮	5373-11-5	1	1.65059e+07	1.21024e+07	1.45058e+07	3.03611e+07	3.17633e+07	3.28551e+07	2.42714e+07	2.42778e+07	23820360	C03951	ko00944	1.25058	0.00100657	2.20298	1.13945	up
mws1212	209.08	177.05	208.074	C11H12O4	[M+H]+	Ferulic acid methyl ester	阿魏酸甲酯	Phenolic acids	酚酸类	Phenolic acids	酚酸类	2309-07-1	3	491510	485858	500212	1.19368e+06	1.15762e+06	1.15552e+06	942102	940655	923721	-	-	1.2835	8.76347e-05	2.37335	1.24693	up
Cmsp008121	287.09	167.03	286.084	C16H14O5	[M+H]+	7-O-Methylnaringenin	7-甲基柚皮素	Flavonoids	黄酮	Flavanones	二氢黄酮	-	2	325617	306379	286957	1.03895e+06	1.15574e+06	1.06037e+06	730931	727916	743953	-	-	1.28035	0.000953475	3.54213	1.82462	up
Jmgn005927	287.06	125.03	288.063	C15H12O6	[M-H]-	2-hydroxynaringenin	2-羟基柚皮素	Flavonoids	黄酮	Flavanones	二氢黄酮	-	2	4.76141e+06	4.81552e+06	4.77199e+06	1.26647e+07	1.29982e+07	1.36941e+07	8.87568e+06	8.6859e+06	8.65348e+06	-	-	1.28286	0.00128321	2.74285	1.45568	up
Lmhp007836	448.25	307.23	447.239	C21H38NO7P	[M+H]+	LysoPE 16:3	溶血磷脂酰乙醇胺 16:3	Lipids	脂质	LPE	溶血磷脂酰乙醇胺	-	3	106789	73339.7	97942.5	423189	571718	374146	279672	272316	272910	-	-	1.25574	0.0230749	4.9234	2.29965	up
MWS20151	271.06	153.02	270.053	C15H10O5	[M+H]+	Apigenin; 4',5,7-Trihydroxyflavone	芹菜素	Flavonoids	黄酮	Flavones	黄酮	520-36-5	1	3.92841e+06	3.96137e+06	3.84453e+06	1.84706e+07	1.90392e+07	2.12981e+07	1.20532e+07	1.19028e+07	1.16962e+07	C01477	ko00941,ko00944,ko01100,ko01110	1.2823	0.00297576	5.01162	2.32528	up
Lahp004442	273.07	153.02	272.068	C15H12O5	[M+H]+	3,4-Dihydro-4-(4'-hydroxyphenyl)-5,7-dihydroxycoumarin*	3,4-二氢-4-(4'-羟基苯基)-5,7-二羟基香豆素*	Lignans and Coumarins	木脂素和香豆素	Coumarins	香豆素	-	1	1.3452e+07	1.26405e+07	1.09078e+07	3.26809e+07	38074976	3.5429e+07	2.19603e+07	2.22116e+07	2.15429e+07	-	-	1.27107	0.00111516	2.86983	1.52097	up
Zmgn002106	206.08	58.03	207.089	C11H13NO3	[M-H]-	N-Acetyl-L-phenylalanine	N-乙酰-L-苯丙氨酸	Amino acids and derivatives	氨基酸及其衍生物	Amino acids and derivatives	氨基酸及其衍生物	2018-61-3	1	885588	800582	822796	4.17536e+06	4.481e+06	4.2819e+06	2.34162e+06	2.41288e+06	2.39829e+06	C03519	ko00360,ko01100	1.28288	0.000280846	5.15681	2.36648	up
Jmwn002620	341.086	161.02	342.095	C15H18O9	[M-H]-	Vanillic Acid-4-O-Glucuronide	香草酸-4-O-葡萄糖醛酸苷	Phenolic acids	酚酸类	Phenolic acids	酚酸类	-	3	3.20379e+06	3.32416e+06	2.9135e+06	1.03528e+07	1.05142e+07	1.08105e+07	7.43128e+06	7.20601e+06	7.27528e+06	-	-	1.28126	2.34307e-06	3.35515	1.74638	up
mws0281	191.02	111.01	192.027	C6H8O7	[M-H]-	Citric Acid	柠檬酸	Organic acids	有机酸	Organic acids	有机酸	77-92-9	1	1.16939e+07	1.16015e+07	1.23875e+07	2.46507e+07	2.35781e+07	2.43066e+07	1.88845e+07	1.91653e+07	1.85636e+07	C00158	ko00020,ko00250,ko00630,ko01100,ko01110,ko01200,ko01210,ko01230,ko01240	1.28108	1.13189e-05	2.03278	1.02346	up
Lmbn002072	159.07	97.07	160.074	C7H12O4	[M-H]-	2-Propylsuccinic acid*	2-丙基琥珀酸*	Organic acids	有机酸	Organic acids	有机酸	618-57-5	3	1.22969e+06	1.24145e+06	1.22124e+06	386620	431655	451548	760180	739067	761515	C16657	-	1.27926	0.000205131	0.343903	-1.53992	down
Wafn002827	357.12	195.07	358.126	C16H22O9	[M-H]-	Dihydroferulic acid glucoside	二氢阿魏酸 葡萄糖苷	Phenolic acids	酚酸类	Phenolic acids	酚酸类	-	1	1.46048e+06	1.48621e+06	1.34267e+06	3.02839e+06	2.97563e+06	3.05446e+06	2.3004e+06	2.36631e+06	2.38084e+06	-	-	1.27947	6.3957e-05	2.11185	1.0785	up
mws1346	162.08	98.06	161.069	C6H11NO4	[M+H]+	DL-2-Aminoadipic acid	DL-2-氨基己二酸	Alkaloids	生物碱	Alkaloids	生物碱	542-32-5	3	1.48138e+06	1.2193e+06	1.41086e+06	3.39116e+06	3.57697e+06	3.08842e+06	2.43904e+06	2.345e+06	2.38682e+06	C00956	ko00300,ko00310,ko01100,ko01110,ko01210,ko01230	1.26747	0.000998016	2.44594	1.29039	up
Lmsn003111	325.09	145.03	326.1	C15H18O8	[M-H]-	1-O-p-Coumaroyl-β-D-glucose	1-O-对香豆酰-β-D-葡萄糖	Phenolic acids	酚酸类	Phenolic acids	酚酸类	7139-64-2	1	1.11296e+06	1.08691e+06	1.22319e+06	4.92645e+06	4.55742e+06	4.64686e+06	3.20339e+06	3.33248e+06	3.2421e+06	C16827	-	1.28175	0.000251709	4.1281	2.04548	up
pmp000786	345.1	330.07	344.09	C18H16O7	[M+H]+	Eupatorin; 3',5-Dihydroxy-4',6,7-Trimethoxyflavone	泽兰黄素; 3',5-二羟基-4',6,7-三甲氧基黄酮	Flavonoids	黄酮	Flavones	黄酮	855-96-9	3	89576.3	90130.1	87414.4	196634	220391	190529	156354	154017	160573	-	-	1.27641	0.00604753	2.27445	1.18552	up
Lmbn007891	313.24	183.14	314.246	C18H34O4	[M-H]-	Hydroxy ricinoleic acid	羟基蓖麻油酸	Lipids	脂质	Free fatty acids	游离脂肪酸	-	3	170777	156627	154150	380704	314540	314991	225489	224673	216689	-	-	1.26087	0.0117689	2.09786	1.06892	up
pmb0492	584.28	325	583.268	C34H37N3O6	[M+H]+	N',N'',N'''-p-Coumaroyl-cinnamoyl-caffeoyl spermidine	N',N'',N'''-对香豆酰肉桂酰咖啡酰亚精胺	Alkaloids	生物碱	Phenolamine	酚胺	-	3	2.26858e+06	2.2377e+06	2.10921e+06	607390	586501	564023	1.03793e+06	1.08239e+06	1.04485e+06	-	-	1.28279	0.000466479	0.265727	-1.91198	down
Zmhn002422	355.1	193.05	356.111	C16H20O9	[M-H]-	1-O-Feruloyl-β-D-glucose	1-O-阿魏酰-β-D-葡萄糖	Phenolic acids	酚酸类	Phenolic acids	酚酸类	7196-71-6	1	683056	754622	685462	1.78288e+06	1.71591e+06	1.8077e+06	1.45858e+06	1.40654e+06	1.39808e+06	C17759	-	1.28026	9.86798e-06	2.49936	1.32156	up
Lmbn003524	171.1	99.08	172.11	C9H16O3	[M-H]-	9-Oxononanoic acid	9-氧代壬酸	Organic acids	有机酸	Organic acids	有机酸	2553-17-5	3	952857	904909	930610	440470	477440	435159	663974	640148	668620	C16322	ko00592,ko01110	1.279	1.56263e-05	0.485253	-1.04319	down
pmn001689	311.22	223.17	312.23	C18H32O4	[M-H]-	9-Hydroxy-12-oxo-15(Z)-octadecenoic acid	9-羟基-12-氧代-15(Z)-十八碳烯酸	Lipids	脂质	Free fatty acids	游离脂肪酸	-	3	4.26905e+06	4.75214e+06	4.8578e+06	1.04539e+07	1.03891e+07	1.03104e+07	6.9666e+06	7.26732e+06	6.98408e+06	C21924	ko00592,ko01110	1.27793	0.000585751	2.24465	1.16649	up
pme2960	273.08	153.02	272.068	C15H12O5	[M+H]+	Naringenin chalcone; 2',4,4',6'-Tetrahydroxychalcone*	柚皮素查耳酮*	Flavonoids	黄酮	Chalcones	查耳酮	73692-50-9	1	2.69858e+07	1.49782e+07	1.32493e+07	4.18692e+07	41154195	4.56379e+07	2.77008e+07	2.64868e+07	2.75371e+07	C06561	ko00941,ko01100,ko01110	1.15061	0.0214199	2.33026	1.22049	up
pme1286	385.13	250	384.122	C14H20N6O5S	[M+H]+	S-(5'-Adenosy)-L-homocysteine	S-(5-腺苷)-L-高半胱氨酸	Amino acids and derivatives	氨基酸及其衍生物	Amino acids and derivatives	氨基酸及其衍生物	979-92-0	1	3.32585e+06	3.02202e+06	3.22723e+06	8.55833e+06	8.80767e+06	8.6176e+06	5.70438e+06	5.6427e+06	5.44289e+06	C00021	ko00270,ko01100,ko01230,ko01240	1.28188	1.71716e-06	2.71366	1.44024	up
pmf0096	88.99	70.98	89.9953	C2H2O4	[M-H]-	Oxalic acid	草酸	Organic acids	有机酸	Organic acids	有机酸	144-62-7	3	290279	249217	240629	96940.7	79228.3	68513.2	158857	162415	166944	C00209	ko00230,ko00630,ko01100	1.25974	0.00177095	0.313645	-1.6728	down
pme2589	159.03	87.04	160.037	C6H8O5	[M-H]-	2-Oxoadipic acid	2-氧代己二酸	Organic acids	有机酸	Organic acids	有机酸	3184-35-8	3	184526	164544	146661	401562	408094	376618	299366	298691	312213	C00322	ko00300,ko00310,ko00380,ko01100,ko01110,ko01210,ko01230,ko01240	1.26773	0.000104416	2.39299	1.25881	up
Lmsn000381	341.11	89.02	342.116	C12H22O11	[M-H]-	D-Maltose*	D-麦芽糖*	Others	其它类	Saccharides	糖类	69-79-4	1	5.90406e+06	6.05696e+06	6.40527e+06	1.86805e+07	2.06142e+07	1.92003e+07	1.05539e+07	1.02314e+07	1.0039e+07	C01971	-	1.28142	0.00105064	3.18492	1.67126	up
Hmtn001288	181.05	135.04	182.058	C9H10O4	[M-H]-	Methyl 2,4-dihydroxyphenylacetate*	2,4-二羟基苯乙酸甲酯*	Phenolic acids	酚酸类	Phenolic acids	酚酸类	67828-42-6	3	108942	77457.8	88512.5	311817	306254	315232	211170	215891	204785	-	-	1.26761	0.000873818	3.39491	1.76338	up
zjgp122317	515.15	177.05	514.148	C26H26O11	[M+H]+	4-O-(2''-O-acetyl-6''-P-coumaroyl-β-D-glucopyranosyl)-P-coumaric acid	4-O-(2''-O-乙酰基-6''-P-香豆酰-β-D-吡喃葡萄糖基)-P-香豆酸	Others	其它类	Others	其它	-	1	3.30516e+06	3.07989e+06	2.02725e+06	8.53751e+06	9.06825e+06	7.77785e+06	5.64631e+06	5.83898e+06	5.5429e+06	-	-	1.23578	0.000487291	3.01744	1.59333	up
mws0906	341.12	179.07	342.132	C16H22O8	[M-H]-	Coniferin	松柏苷	Phenolic acids	酚酸类	Phenolic acids	酚酸类	531-29-3	3	1.5971e+06	1.31244e+06	1.90547e+06	4.0038e+06	3.99406e+06	4.01505e+06	3.19698e+06	3.09258e+06	3.03409e+06	C00761	ko00940,ko01110	1.25058	0.00501096	2.49489	1.31897	up
mws0044	303.05	125.02	304.058	C15H12O7	[M-H]-	Taxifolin(Dihydroquercetin)	花旗松素(二氢槲皮素)	Flavonoids	黄酮	Flavanonols	二氢黄酮醇	480-18-2	1	1.56541e+06	1.47452e+06	1.45819e+06	3.48553e+06	3.43929e+06	3.43328e+06	2.33715e+06	2.44641e+06	2.33689e+06	C01617	ko00941,ko01100,ko01110	1.28227	1.91988e-05	2.30276	1.20337	up
pmn001319	413.12	398.1	414.132	C22H22O8	[M-H]-	1-O-Feruloyl-3-O-p-Coumaroylglycerol	1-O-阿魏酰-3-O-对香豆酰甘油	Phenolic acids	酚酸类	Phenolic acids	酚酸类	-	1	473412	426024	416605	1.03996e+06	1.11799e+06	1.13907e+06	727533	701779	740483	-	-	1.2772	0.000207033	2.50525	1.32496	up
Xmyp005654	449.11	287.06	448.101	C21H20O11	[M+H]+	Kaempferol-4'-O-glucoside	山柰酚-4'-O-葡萄糖苷	Flavonoids	黄酮	Flavonols	黄酮醇	-	1	14813319	1.42164e+07	1.47754e+07	3.38248e+07	3.40505e+07	3.5576e+07	2.47486e+07	2.35852e+07	2.48174e+07	-	-	1.28269	0.000220085	2.36163	1.23978	up
MWSHY0196	285.076	242.06	284.068	C16H12O5	[M+H]+	Genkwanin (Apigenin 7-methyl ether)*	芫花素 (5,4'-二羟基-7-甲氧基黄酮)*	Flavonoids	黄酮	Flavones	黄酮	437-64-9	1	209555	160112	127664	641570	697430	700174	358373	344541	364210	C10046	-	1.25826	0.000100192	4.10023	2.03571	up
mws5037	203.14	86.1	202.132	C9H18N2O3	[M+H]+	L-Alanyl-L-leucine	L-丙氨酰-L-亮氨酸	Amino acids and derivatives	氨基酸及其衍生物	Amino acids and derivatives	氨基酸及其衍生物	3303-34-2	3	1.7954e+06	1.8384e+06	1.83009e+06	3.63772e+06	3.71217e+06	3.6719e+06	3.11388e+06	2.94254e+06	3.06889e+06	-	-	1.28373	1.93883e-06	2.01721	1.01236	up
mws0341	131.07	85.07	132.079	C6H12O3	[M-H]-	2-Hydroxyisocaproic acid	2-羟基异己酸	Organic acids	有机酸	Organic acids	有机酸	20312-37-2	3	591666	593279	140516	2.36405e+06	2.41189e+06	2.38291e+06	1.4412e+06	1.48186e+06	1.52892e+06	C03264	-	1.14315	0.00562214	5.40103	2.43323	up
Wbtn006721	285.04	133.03	286.048	C15H10O6	[M-H]-	6,8-dihydroxy-3-methyl-9-oxoxanthene-1-carboxylic acid	6,8-二羟基-3-甲基-9-氧杂蒽-1-羧酸	Others	其它类	Ketone compounds	酮类化合物	-	1	715056	737762	666240	1.71356e+06	1.83833e+06	1.71748e+06	1.15415e+06	1.09698e+06	1.15626e+06	-	-	1.27978	0.000188244	2.48666	1.31421	up
Zbsp006043	315.09	300.06	314.079	C17H14O6	[M+H]+	5,4'-Dihydroxy-3,7-dimethoxyflavone(Kumatakenin)	5,4'-二羟基-3,7-二甲氧基黄酮(华良姜素,熊竹素)	Flavonoids	黄酮	Flavonols	黄酮醇	3301-49-3	2	1.08057e+06	1.05255e+06	1.044e+06	2.43574e+06	2.40424e+06	2.52995e+06	1.78612e+06	1.69412e+06	1.70003e+06	-	-	1.28295	0.000299091	2.31969	1.21393	up
Lmhp007598	534.36	184.07	533.348	C27H52NO7P	[M+H]+	LysoPC 19:2(2n isomer)	溶血磷脂酰胆碱 19:2(2n异构)	Lipids	脂质	LPC	溶血磷脂酰胆碱	-	3	1.40406e+07	1.2186e+07	1.38086e+07	6.40437e+06	6.61055e+06	6.96263e+06	1.23757e+07	1.28521e+07	1.31819e+07	-	-	1.27058	0.00476233	0.498998	-1.00289	down
Lmbp102601	163.04	89.04	162.032	C9H6O3	[M+H]+	7-Hydroxycoumarin;Umbelliferone	7-羟基香豆素;伞形酮	Lignans and Coumarins	木脂素和香豆素	Coumarins	香豆素	93-35-6	3	1.49903e+06	1.4076e+06	1.1512e+06	2.86121e+06	2.99098e+06	2.94323e+06	2.17882e+06	2.22678e+06	2.32434e+06	C09315	ko00999,ko01110	1.25761	0.00178251	2.16752	1.11605	up
pme0170	217.13	158.08	216.122	C8H16N4O3	[M+H]+	N-Acetyl-L-Arginine	N-乙酰-L-精氨酸	Amino acids and derivatives	氨基酸及其衍生物	Amino acids and derivatives	氨基酸及其衍生物	155-84-0	2	1.47396e+06	1.58364e+06	1.49837e+06	8.80127e+06	9.77146e+06	9.44958e+06	5.31449e+06	4.97353e+06	5.174e+06	-	-	1.28311	0.00116568	6.15069	2.62075	up
mws0064	287.06	135.05	288.063	C15H12O6	[M-H]-	Eriodictyol (5,7,3',4'-Tetrahydroxyflavanone)	圣草酚	Flavonoids	黄酮	Flavanones	二氢黄酮	552-58-9	3	243556	245239	239984	635783	592031	659216	376885	399775	399657	C05631	ko00941,ko01100,ko01110	1.28126	0.00246083	2.58931	1.37256	up
Hmln005329	255.07	239.04	256.074	C15H12O4	[M-H]-	Ephemeranthoquinone B	5-羟基-2-甲氧基-9,10-二氢菲-1,4-醌	Quinones	醌类	PhenAnthraquinones	菲醌	-	3	143395	141443	137596	285220	298631	280342	217503	203257	212590	-	-	1.28164	0.000568396	2.04575	1.03263	up
MWS201475	333.19	84.08	332.185	C17H24N4O3	[M+H]+	Lys-Trp	L-赖氨酸-L-色氨酸	Amino acids and derivatives	氨基酸及其衍生物	Amino acids and derivatives	氨基酸及其衍生物	50674-18-5	3	129804	130985	143813	324582	329222	308989	261185	245066	261142	-	-	1.2792	3.34854e-05	2.3796	1.25072	up
Zmjp008503	329.1	296.07	328.095	C18H16O6	[M+H]+	5-Hydroxy-4',6,7-trimethoxyflavone (Salvigenin)	三裂鼠尾草素 (5-羟基-4',6,7-三甲氧基黄酮)	Flavonoids	黄酮	Flavones	黄酮	19103-54-9	1	83320.3	66363.5	61411.6	188389	252547	170782	130416	139143	138915	-	-	1.23602	0.0263703	2.89783	1.53497	up
Lmfn004235	359.08	161.02	360.084	C18H16O8	[M-H]-	Myricetin-3,7,3'-trimethyl ether*	杨梅素-3,7,3'-三甲醚*	Flavonoids	黄酮	Flavonols	黄酮醇	-	1	89604.8	267005	75238.8	335928	444092	496673	259946	242507	245870	-	-	1.06917	0.0249068	2.95634	1.56381	up
pmn001492	187.04	123.04	188.047	C11H8O3	[M-H]-	Ayapin	泽兰内酯	Lignans and Coumarins	木脂素和香豆素	Coumarins	香豆素	494-56-4	3	5.8192e+06	6.7936e+06	6.08461e+06	2.94159e+06	2.98799e+06	3.13701e+06	4.50711e+06	4.19348e+06	4.44507e+06	C18078	-	1.2719	0.00636628	0.484912	-1.04421	down
pma1751	286.09	124.04	285.085	C12H15NO7	[M+H]+	N-(beta-D-Glucosyl)nicotinate*	N-葡萄糖基烟酸*	Others	其它类	Vitamin	维生素	-	3	404077	314673	356756	1.32977e+06	1.43189e+06	1.39373e+06	962312	930106	890455	-	-	1.27626	1.53617e-05	3.86367	1.94997	up
Lmmn003323	271.23	225.22	272.235	C16H32O3	[M-H]-	2-Hydroxyhexadecanoic acid	2-羟基十六烷酸	Organic acids	有机酸	Organic acids	有机酸	764-67-0	1	2754153	2.4436e+06	2.75445e+06	8.12778e+06	8.54748e+06	8.72637e+06	5.12113e+06	4.98634e+06	5.39051e+06	-	-	1.28029	5.66361e-05	3.19429	1.6755	up
Zbxp007259	533.13	285.08	532.121	C25H24O13	[M+H]+	Acacetin-7-O-Malonyl-galactoside	金合欢素-7-O-丙二酰基-半乳糖苷	Flavonoids	黄酮	Flavones	黄酮	-	1	1.18824e+06	1.09987e+06	1.11393e+06	2.13323e+06	2.40223e+06	2.28301e+06	1.64328e+06	1.53961e+06	1.52902e+06	-	-	1.27495	0.0020484	2.00423	1.00305	up
pmn001337	431.1	269.1	432.106	C21H20O10	[M-H]-	Emodin-8-O-glucoside*	大黄素-8-O-葡萄糖苷*	Quinones	醌类	Anthraquinone	蒽醌	23313-21-5	1	235238	214692	233932	467836	489752	521324	291222	302625	279115	C10345	-	1.27624	0.000974074	2.16259	1.11276	up
mws2220	457.08	169.01	458.085	C22H18O11	[M-H]-	Gallocatechin 3-O-gallate*	没食子儿茶素 3-O-没食子酸酯*	Flavonoids	黄酮	Flavanols	黄烷醇类	5127-64-0	1	151410	259260	99854.6	47184.9	70328.3	59894.2	127692	128020	118901	-	-	1.09932	0.139164	0.3475	-1.52491	down
HJAP135	505.12	257.08	504.127	C24H24O12	[M+H]+	Pinocembrin-7-O-(6''-O-malonyl)glucoside	乔松素-7-O-(6''-O-丙二酰)葡萄糖苷	Flavonoids	黄酮	Flavanones	二氢黄酮	-	3	91843.1	103006	83900.6	175429	230640	159729	139158	127954	134408	-	-	1.20899	0.0397854	2.02977	1.02132	up
HJN003	385.11	223.06	386.121	C17H22O10	[M-H]-	1-O-Sinapoyl-β-D-glucose	1-O-芥子酰-D-葡萄糖	Phenolic acids	酚酸类	Phenolic acids	酚酸类	-	2	1.54945e+06	1.62676e+06	1.6104e+06	3.57096e+06	3.66811e+06	4.29139e+06	3.36384e+06	3.47385e+06	3.18977e+06	C01175	ko00940,ko01110	1.27276	0.00934324	2.4089	1.26838	up
Lmsn002288	503.14	341.09	504.148	C21H28O14	[M-H]-	1-O-Caffeoyl-(6-O-glucosyl)-β-D-glucose	1-O-咖啡酰-6-O-葡萄糖基-β-D-葡萄糖	Phenolic acids	酚酸类	Phenolic acids	酚酸类	-	1	1.8214e+06	1.59741e+06	1.83471e+06	4.2131e+06	4.10181e+06	3.82469e+06	3.57649e+06	3.83298e+06	3.54446e+06	-	-	1.27369	0.00019546	2.31076	1.20837	up
Zmlp007578	345.06	313.03	344.053	C17H12O8	[M+H]+	3,3',4-O-Trimethylellagic acid	3,3',4-O-三甲基鞣花酸	Tannins	鞣质	Tannin	鞣质	1617-49-8	3	501734	779080	710669	1.65707e+06	1.80293e+06	1.70163e+06	1.28447e+06	1.17653e+06	1.22871e+06	C10836	-	1.23633	0.00150776	2.59185	1.37398	up
mws1080	341.11	179.06	342.116	C12H22O11	[M-H]-	Galactinol	肌醇半乳糖苷	Others	其它类	Saccharides	糖类	3687-64-7	1	7.48964e+06	7.94336e+06	8.17254e+06	2.19194e+07	2.10757e+07	2.20953e+07	1.2951e+07	1.18855e+07	1.2685e+07	C01235	ko00052,ko01100	1.282	1.50471e-05	2.75742	1.46332	up
pme2237	181.072	101.024	182.079	C6H14O6	[M-H]-	Dulcitol	半乳糖醇	Others	其它类	Saccharides	糖类	608-66-2	3	216646	217180	201722	521366	505936	518226	378709	354942	347729	C01697	ko00052,ko01100	1.28202	1.71162e-06	2.4318	1.28203	up
Lmyp003387	192.07	146.06	191.058	C10H9NO3	[M+H]+	2-Oxo-3,4-dihydro-1H-quinoline-3-carboxylic acid	2-氧-3,4-二氢-1H-喹啉-3-羧酸	Alkaloids	生物碱	Quinoline alkaloids	喹啉类生物碱	246867-17-4	3	379004	474310	491761	1.05289e+06	1.1463e+06	1.08133e+06	701181	698191	756055	-	-	1.26167	0.000185787	2.43891	1.28624	up
Zmjn001813	159.07	97.06	160.074	C7H12O4	[M-H]-	Pimelic acid*	庚二酸*	Organic acids	有机酸	Organic acids	有机酸	111-16-0	3	1.25216e+06	1.30041e+06	1.28964e+06	428998	435972	418675	774448	716898	779588	C02656	ko00780,ko01100,ko01240	1.28359	7.10506e-05	0.33409	-1.58169	down
Hahn001170	345.12	183.07	346.126	C15H22O9	[M-H]-	Aucubin	桃叶珊瑚苷	Terpenoids	萜类	Sesquiterpenoids	倍半萜	479-98-1	3	4.84889e+06	4.46401e+06	4.43271e+06	1.51143e+06	1.55676e+06	1.4133e+06	2.66767e+06	2.53158e+06	2.43289e+06	C09771	-	1.28087	0.000801038	0.326031	-1.61692	down
pme2024	177.1	160.08	176.095	C10H12N2O	[M+H]+	Serotonin	血清素; 5-羟色胺	Alkaloids	生物碱	Plumerane	吲哚类生物碱	50-67-9	1	3.7716e+06	3.04604e+06	3.80554e+06	8.89655e+06	6.69634e+06	6.63504e+06	6.39971e+06	5.9828e+06	5.83362e+06	C00780	ko00380,ko01100,ko01110	1.21948	0.0255491	2.0924	1.06516	up
Hmhn003518	355.1	175.04	356.111	C16H20O9	[M-H]-	4-O-β-D-glucopyranosylferulic acid	4-O-β-D-葡萄糖基阿魏酸	Phenolic acids	酚酸类	Phenolic acids	酚酸类	-	1	3.78896e+06	3.51333e+06	3.52432e+06	1.58273e+07	1.59382e+07	1.54711e+07	1.07703e+07	1.17327e+07	1.08256e+07	-	-	1.28333	1.5103e-06	4.36302	2.12533	up
pme0193	147.08	84.04	146.069	C5H10N2O3	[M+H]+	L-Glutamine	L-谷氨酰胺	Amino acids and derivatives	氨基酸及其衍生物	Amino acids and derivatives	氨基酸及其衍生物	56-85-9	1	2.14207e+06	2.00136e+06	2.12613e+06	816942	834828	821694	1.38618e+06	1.40442e+06	1.28056e+06	C00064	ko00220,ko00230,ko00240,ko00250,ko00470,ko00630,ko00750,ko00910,ko00970,ko01100,ko01230,ko01232,ko01240,ko02010	1.2827	0.00107168	0.39452	-1.34183	down
Zjhp090604	287.09	167.04	286.084	C16H14O5	[M+H]+	5,7-dihydroxy-3-(4'-hydroxybenzyl)-chroman-4-one	5,7-二羟基-3-(4'-羟基苄基)-色满-4-酮	Flavonoids	黄酮	Other Flavonoids	其它类黄酮	-	1	875701	957329	911095	1.91511e+06	1.96751e+06	1.85864e+06	1.60166e+06	1.47968e+06	1.46576e+06	-	-	1.27981	2.66262e-05	2.0922	1.06502	up
pmn001702	461.07	285.05	462.08	C21H18O12	[M-H]-	Tetahydroxyflavone-7-O-glucuronide*	四羟基黄酮-7-O-葡萄糖醛酸苷*	Flavonoids	黄酮	Flavones	黄酮	-	3	56050.9	87819.3	65227.5	191415	211377	649771	164397	179835	178990	-	-	1.11955	0.200468	5.03383	2.33166	up
Lmyp001375	314.09	152.03	313.08	C13H15NO8	[M+H]+	BOA-6-O-glucoside	2-苯并恶唑酮-6-O-葡萄糖苷	Alkaloids	生物碱	Alkaloids	生物碱	-	3	283643	203547	232450	830225	416305	433734	365078	354545	330086	-	-	1.09795	0.137562	2.33487	1.22334	up
Lmhn003074	309.06	193.05	310.069	C14H14O8	[M-H]-	Feruloylmalic acid	阿魏酰苹果酸	Phenolic acids	酚酸类	Phenolic acids	酚酸类	-	3	129036	107611	112012	265082	244140	256833	170157	158417	175598	-	-	1.26946	0.000102459	2.19715	1.13563	up
MWSmce203	341.12	73.03	342.116	C12H22O11	[M-H]-	D-Cellobiose	D-纤维二糖	Others	其它类	Saccharides	糖类	528-50-7	3	109607	162454	111307	274423	256823	266574	175418	184278	194744	-	-	1.21343	0.010481	2.08109	1.05734	up
mws0277	191.06	85.03	192.063	C7H12O6	[M-H]-	Quinic Acid	奎宁酸	Organic acids	有机酸	Organic acids	有机酸	77-95-2	2	760249	685863	752265	1.60757e+06	1.37035e+06	1.55177e+06	1.27988e+06	1.25717e+06	1.15631e+06	C00296	ko00400,ko01100	1.26755	0.00461059	2.06047	1.04297	up
Zmyn000268	89.02	71.02	90.0317	C3H6O3	[M-H]-	2,3-Dihydroxypropanal	2,3-二羟基丙醛; 甘油醛	Others	其它类	Saccharides	糖类	56-82-6	3	28712.2	38703.1	28195.1	8321.32	14083.1	10374.9	16084.6	17909.1	17203.3	C02154	-	1.21569	0.012761	0.342843	-1.54438	down
MWSHY0021	299.09	256.07	298.084	C17H14O5	[M+H]+	Apigenin-7,4'-dimethyl ether	芹菜素-7,4'-二甲醚	Flavonoids	黄酮	Flavones	黄酮	5128-44-9	1	137068	135717	142913	592031	608620	620987	375079	343592	340661	C10019	-	1.28365	0.000137998	4.38213	2.13163	up
mws0264	341.11	119.03	342.116	C12H22O11	[M-H]-	D-Trehalose*	D-海藻糖*	Others	其它类	Saccharides	糖类	99-20-7	1	3.41244e+06	3.40099e+06	3.19613e+06	1.03721e+07	9.5377e+06	8.24981e+06	5.35516e+06	5.96681e+06	5.83591e+06	C01083	ko00500,ko01100,ko01110,ko02010	1.27228	0.00953975	2.81327	1.49225	up
pme3011	104.07	69.03	103.063	C4H9NO2	[M+H]+	γ-Aminobutyric acid	γ-氨基丁酸	Organic acids	有机酸	Organic acids	有机酸	56-12-2	3	2.52035e+06	2.46683e+06	2.48557e+06	5.38035e+06	5.48446e+06	5.42111e+06	3.51022e+06	3.822e+06	3.4399e+06	C00334	ko00250,ko00330,ko00410,ko00650,ko00760,ko01100	1.28386	3.44758e-06	2.17937	1.12391	up
pmb0323	251.14	163.04	250.132	C13H18N2O3	[M+H]+	N-Caffeoylputrescine	咖啡酰腐胺	Alkaloids	生物碱	Phenolamine	酚胺	29554-26-5	3	183477	198405	194392	82634.6	68976.7	106653	136893	153328	144698	C03002	-	1.22484	0.00483242	0.448163	-1.15791	down
Wacp005868	541.11	421.05	540.106	C30H20O10	[M+H]+	Dihydro-2',8''-biapigenin	二氢-2',8''-双芹菜素	Flavonoids	黄酮	Biflavones	双黄酮	-	3	185241	162449	82615.5	421184	429054	406823	269570	299478	274415	-	-	1.17379	0.0100351	2.92132	1.54662	up
pme0253	174.11	86.1	173.105	C8H15NO3	[M+H]+	N-Acetyl-L-leucine	N-乙酰-L-亮氨酸	Amino acids and derivatives	氨基酸及其衍生物	Amino acids and derivatives	氨基酸及其衍生物	1188-21-2	3	740053	636760	687850	1.43049e+06	1.50179e+06	1.30086e+06	1.03746e+06	1.04146e+06	1.147e+06	C02710	-	1.26612	0.00171475	2.05028	1.03582	up
Hmlp005105	285.08	270.05	284.068	C16H12O5	[M+H]+	3,7-dihydroxy-4'-methoxyflavone	3,7-二羟基-4'-甲氧基黄酮	Flavonoids	黄酮	Flavones	黄酮	-	3	1.55481e+06	1.44643e+06	1.36233e+06	7.38601e+06	8.13098e+06	7.81658e+06	4.29478e+06	4.46068e+06	4.80943e+06	-	-	1.28215	0.000614371	5.34736	2.41883	up
Wacn007198	539.1	413.06	540.106	C30H20O10	[M-H]-	2,3-Dihydroamentoflavone	2,3-二氢穗花杉双黄酮	Flavonoids	黄酮	Biflavones	双黄酮	-	2	82694.3	84551.3	71103.9	185941	205456	209496	135314	138359	123753	-	-	1.27156	0.000509925	2.52106	1.33403	up
pmn001423	385.19	223.14	386.194	C19H30O8	[M-H]-	Roseoside	长寿花糖苷	Others	其它类	Ketone compounds	酮类化合物	54835-70-0	3	5.3713e+06	5.37246e+06	5.38629e+06	1.38162e+07	1.46377e+07	1.4192e+07	1.10345e+07	1.14691e+07	1.02159e+07	-	-	1.28342	0.000717544	2.64388	1.40266	up
pmp000344	271.06	243.06	270.053	C15H10O5	[M+H]+	3',4',7-Trihydroxyflavone	3',4',7-三羟基黄酮	Flavonoids	黄酮	Flavones	黄酮	2150-11-0	1	372902	289206	331715	1.26171e+06	1.23727e+06	1.47951e+06	831413	920534	923768	-	-	1.27287	0.00321367	4.00322	2.00116	up
MWSmce415	315.09	282.06	314.079	C17H14O6	[M+H]+	Cirsimaritin (4',5-dihydroxy-6,7-dimethoxyflavone)*	蓟黄素 (4',5-二羟基-6,7-二甲氧基黄酮)*	Flavonoids	黄酮	Flavones	黄酮	6601-62-3	3	105803	117086	131078	238036	244669	233480	179551	160937	177611	C17785	-	1.26408	0.000981738	2.02331	1.01672	up
Lmjn003562	693.2	175.04	694.211	C32H38O17	[M-H]-	3,6'-Diferuloylsucrose	3,6'-二阿魏酰蔗糖	Phenolic acids	酚酸类	Phenolic acids	酚酸类	107172-40-7	3	14103.3	12016.3	10990	34195.4	30704.8	35478.6	22854.2	21840.1	24579.1	-	-	1.26602	0.000583383	2.70493	1.43559	up
mws1155	181.07	101.02	182.079	C6H14O6	[M-H]-	D-Mannitol	D-甘露醇	Others	其它类	Saccharides	糖类	69-65-8	3	53880	41915.8	48226.4	118557	112715	107981	69025.4	76914.5	69837.5	C00392	ko00051,ko01100,ko02010	1.26366	0.000160917	2.35556	1.23607	up
Zblp004317	206.08	120.09	205.074	C11H11NO3	[M+H]+	(S)-3-(2-oxopropyl)-3-hydroxyindolin-2-one	(S)-3-(2-氧丙基)-3-羟基吲哚-2-酮	Alkaloids	生物碱	Plumerane	吲哚类生物碱	-	3	1.88623e+06	2.05281e+06	1.8507e+06	7.3146e+06	6.79891e+06	7.29562e+06	5.01214e+06	4.75778e+06	5.36436e+06	-	-	1.28183	0.000291378	3.69777	1.88665	up
Jmwp003339	285.13	123.04	284.126	C14H20O6	[M+H]+	2-Phenylethy-1-O-β-D-glucoside	2-苯乙基-1-O-β-D-葡萄糖苷	Phenolic acids	酚酸类	Phenolic acids	酚酸类	18997-54-1	3	113909	147482	191515	34803.5	104120	49553.2	130152	130164	116686	-	-	1.03195	0.0461163	0.416149	-1.26483	down
MWS0132	611.15	306.07	612.152	C20H32N6O12S2	[M-H]-	Oxiglutatione	氧化谷胱甘肽	Amino acids and derivatives	氨基酸及其衍生物	Amino acids and derivatives	氨基酸及其衍生物	27025-41-8	2	6.3784e+06	6.94415e+06	5.49918e+06	359342	506718	443995	1.60435e+06	1.50542e+06	1.71074e+06	C00127	ko00480,ko01100,ko01240	1.27883	0.00479246	0.0696033	-3.8447	down
MWS1983	343.12	89.03	344.132	C12H24O11	[M-H]-	Maltitol	麦芽糖醇	Others	其它类	Saccharides	糖类	585-88-6	3	181369	185147	177637	438202	445017	425649	283714	278483	250281	-	-	1.28312	0.000101861	2.40533	1.26623	up
MWSHY0031	447.09	271.06	446.085	C21H18O11	[M+H]+	Apigenin-7-O-glucuronide	芹菜素-7-O-葡萄糖醛酸苷	Flavonoids	黄酮	Flavones	黄酮	29741-09-1	3	88682.1	125826	98022.1	163135	160213	319439	158916	177536	179727	-	-	1.03436	0.16658	2.05672	1.04035	up
mws0214	181.07	71.01	182.079	C6H14O6	[M-H]-	D-Sorbitol	D-山梨糖醇	Others	其它类	Saccharides	糖类	50-70-4	3	120987	122894	130287	330645	374222	323747	251034	227508	221403	C00794	ko00051,ko00052,ko01100,ko02010	1.27776	0.00418249	2.74906	1.45894	up
Lmzn001894	461.07	285.04	462.08	C21H18O12	[M-H]-	Kaempferol-3-O-glucuronide*	山柰酚-3-O-葡萄糖醛酸苷*	Flavonoids	黄酮	Flavonols	黄酮醇	22688-78-4	3	75683.3	73337.4	43466.2	169643	192784	577750	177669	159464	181084	-	-	1.10683	0.199721	4.88437	2.28817	up
mws1200	177.06	145.03	178.063	C10H10O3	[M-H]-	Trans-4-Hydroxycinnamic Acid Methyl Ester	反式-4-羟基肉桂酸甲酯	Phenolic acids	酚酸类	Phenolic acids	酚酸类	19367-38-5	3	308012	299865	310343	630095	671810	636333	478530	514252	548781	-	-	1.28183	0.000841057	2.11087	1.07784	up
MWSHY0121	463.09	287.06	462.08	C21H18O12	[M+H]+	Luteolin-7-O-glucuronide	木犀草素-7-O-葡萄糖醛酸苷	Flavonoids	黄酮	Flavones	黄酮	29741-10-4	3	319162	414633	295547	673450	821882	2.40467e+06	754797	766885	854965	C03515	ko00944	1.05546	0.225864	3.78882	1.92175	up
Lmrn001951	181.05	135.04	182.058	C9H10O4	[M-H]-	(S)-2-Hydroxy-3-(4-Hydroxyphenyl)Propanoic Acid	2-羟基-(4-羟基苯基)丙酸	Phenolic acids	酚酸类	Phenolic acids	酚酸类	23508-35-2	3	95767	98589.8	93923.9	300082	321019	307032	234994	255241	222338	-	-	1.28309	0.000503298	3.21955	1.68686	up
MA10039641	341.11	89.02	342.116	C12H22O11	[M-H]-	Lactobiose	乳二糖	Others	其它类	Saccharides	糖类	63-42-3	1	6.2764e+06	6.04901e+06	7.42031e+06	2.14015e+07	2.06196e+07	1.48287e+07	9.87286e+06	9.95409e+06	1.11643e+07	C00243	ko00052,ko01100,ko02010	1.24473	0.023197	2.87909	1.52562	up
MWSHY0168	345.1	330.08	344.09	C18H16O7	[M+H]+	Eupatilin (5,7-Dihydroxy-3',4',6-Trimethoxyflavone)	异泽兰黄素	Flavonoids	黄酮	Flavones	黄酮	22368-21-4	3	88869.3	134604	115412	183744	220487	280075	144726	146602	164034	C10040	-	1.15379	0.0371306	2.01929	1.01385	up
Lmsp011263	329.1	268.08	328.095	C18H16O6	[M+H]+	6-Hydroxy-5,7,4'-trimethoxyflavone	6-羟基-5,7,4'-三甲氧基黄酮	Flavonoids	黄酮	Flavones	黄酮	6938-19-8	2	24762.4	25940.9	33620.2	67411.1	80511.3	74371.8	50260	52607.5	45356.7	C14985	-	1.25376	0.00092143	2.63621	1.39847	up
mws5038	341.11	89.02	342.116	C12H22O11	[M-H]-	Isomaltulose*	异麦芽酮糖*	Others	其它类	Saccharides	糖类	13718-94-0	1	9.60502e+06	7.71079e+06	7.28273e+06	2.45459e+07	2.16553e+07	2.0537e+07	1.6553e+07	1.5728e+07	1.42414e+07	C01742	-	1.2594	0.00142444	2.7131	1.43994	up
zjgp122326	286.09	124.04	285.085	C12H15NO7	[M+H]+	Pyridine-4-formyl-O-β-D-glucopyranoside*	吡啶-4-甲酰-O-β-D-吡喃葡萄糖酯苷*	Others	其它类	Others	其它	-	3	359951	360307	279192	1.18977e+06	1.16313e+06	1.2074e+06	705650	721801	811964	-	-	1.27287	0.000131339	3.56226	1.83279	up
pme2563	249.06	128.04	250.062	C8H14N2O5S	[M-H]-	γ-Glu-Cys	γ-L-谷氨酸-L-半胱氨酸	Amino acids and derivatives	氨基酸及其衍生物	Amino acids and derivatives	氨基酸及其衍生物	636-58-8	3	58225.7	77610.2	71871.8	807921	838924	885257	457308	523192	460731	C00669	ko00480,ko01100,ko01240	1.28094	0.000429436	12.1907	3.60771	up
mws0061	463.09	300.03	464.096	C21H20O12	[M-H]-	Quercetin-3-O-galactoside (Hyperin)*	槲皮素-3-O-半乳糖苷 (金丝桃苷)*	Flavonoids	黄酮	Flavonols	黄酮醇	482-36-0	3	285343	259120	241592	90045.5	175834	94292.9	217889	188531	214450	C10073	-	1.13249	0.0221515	0.458203	-1.12594	down
pma3101	256.08	124.04	256.082	C11H14NO6+	[M]+	Nicotinate D-ribonucleoside	烟酸核糖核苷	Others	其它类	Vitamin	维生素	17720-18-2	3	6.78962e+06	2.78846e+06	3.84415e+06	9.5661e+06	1.08225e+07	9.83199e+06	9.81951e+06	8.60879e+06	8.55097e+06	C05841	ko00760,ko01100	1.10189	0.0330521	2.25153	1.17091	up
MWSHY0114	285.08	242.06	284.068	C16H12O5	[M+H]+	Acacetin*	金合欢素*	Flavonoids	黄酮	Flavones	黄酮	480-44-4	1	373262	92497.6	83314.1	1.52288e+06	478077	1.47377e+06	264384	225998	253751	C01470	ko00944	1.08954	0.0939456	6.32833	2.66182	up
Hmyp008708	285.08	242.06	284.068	C16H12O5	[M+H]+	Izalpinin*	良姜素*	Flavonoids	黄酮	Flavonols	黄酮醇	480-14-8	1	373262	92497.6	83314.1	1.52288e+06	478077	1.47377e+06	264384	225998	253751	-	-	1.08954	0.0939456	6.32833	2.66182	up
Zblp004068	285.08	242.05	284.068	C16H12O5	[M+H]+	7-Methoxy-3,4'-Dihydroxyflavone	7-甲氧基-3,4'-二羟基黄酮	Flavonoids	黄酮	Flavonols	黄酮醇	-	2	117891	171041	118530	373933	331332	441376	247299	263289	224320	-	-	1.23536	0.00596102	2.8141	1.49268	up
Lmbp000123	164.07	56.05	163.067	C6H13NO2S	[M+H]+	L-Homomethionine	L-高甲硫氨酸	Amino acids and derivatives	氨基酸及其衍生物	Amino acids and derivatives	氨基酸及其衍生物	25148-30-5	3	5.01113e+06	4.93496e+06	4.79952e+06	1.80518e+06	1.8169e+06	1.74838e+06	2.8284e+06	3.06687e+06	3.32495e+06	C17213	ko00966,ko01110,ko01210	1.28343	0.000102543	0.364207	-1.45717	down
ML10172161	103	59.01	104.011	C3H4O4	[M-H]-	Hydroxypyruvic acid*	羟基丙酮酸*	Organic acids	有机酸	Organic acids	有机酸	1113-60-6	3	26345.6	13723.7	26526	40990.5	58071.6	52797.4	42393.8	36738	37043.1	C00168	ko00260,ko00630,ko01100,ko01110,ko01200	1.11816	0.0133661	2.28033	1.18924	up
Lmhn004960	441.08	289.07	442.09	C22H18O10	[M-H]-	7-O-Galloyltricetiflavan	7-O-没食子酰基特利色黄烷	Flavonoids	黄酮	Flavanols	黄烷醇类	-	3	149779	152330	155778	44037.9	66444	49720.2	103071	109412	92756.9	-	-	1.2514	0.0028771	0.349872	-1.5151	down
mws1333	341.11	113.02	342.116	C12H22O11	[M-H]-	Melibiose	蜜二糖	Others	其它类	Saccharides	糖类	585-99-9	1	2.62261e+06	3.04854e+06	2.72279e+06	6.08651e+06	7.27013e+06	7.48438e+06	4.54829e+06	4.49263e+06	3.89906e+06	C05402	ko00052,ko01100,ko02010	1.26542	0.00689507	2.48286	1.31201	up
MWS0205	157.04	97	158.044	C4H6N4O3	[M-H]-	Allantoin	尿囊素	Organic acids	有机酸	Organic acids	有机酸	97-59-6	3	568022	505563	538798	99893.9	234956	164833	337915	365601	309127	C01551	-	1.1891	0.00413826	0.309904	-1.69011	down
Zmhp004065	345.1	330.07	344.09	C18H16O7	[M+H]+	7,8-Dihydroxy-5,6,4'-trimethoxyflavone	7,8-二羟基-5,6,4'-三甲氧基黄酮	Flavonoids	黄酮	Flavones	黄酮	-	2	115531	102344	106488	239542	238571	259343	191041	165522	165764	-	-	1.2766	0.00027275	2.27355	1.18494	up
mws0355	441.08	169.01	442.09	C22H18O10	[M-H]-	Catechin gallate*	儿茶素没食子酸酯*	Flavonoids	黄酮	Flavanols	黄烷醇类	130405-40-2	1	282768	292060	283099	82026.1	112135	78871.1	189593	206960	174639	-	-	1.26086	0.00156253	0.318247	-1.65178	down
Lmcp004624	301.07	258.05	300.063	C16H12O6	[M+H]+	3-Methylkaempferol*	异山柰素*	Flavonoids	黄酮	Flavonols	黄酮醇	1592-70-7	3	93151.1	79032.5	42528.2	190502	136344	230178	137433	162517	158132	C05902	-	1.11259	0.0327172	2.59429	1.37534	up
Zmdn002049	451.13	289.07	452.132	C21H24O11	[M-H]-	Epicatechin-4'-O-β-D-glucopyranoside	表儿茶素-4'-O-β-D-葡萄糖苷	Flavonoids	黄酮	Flavanols	黄烷醇类	-	3	133137	161138	155447	66919.2	56621.6	92581.9	122740	123905	105506	-	-	1.18571	0.00543594	0.480569	-1.05718	down
Zbsp011022	425.38	191	424.371	C30H48O	[M+H]+	Lup-20(29)-en-3-one (Lupenone)	羽扇豆-20(29)-烯-3-酮 (羽扇豆烯酮)	Terpenoids	萜类	Triterpene	三萜	1617-70-5	2	164391	191006	159064	68511.9	60398.6	56664.7	135940	135418	115751	C16990	-	1.26895	0.00401877	0.360717	-1.47106	down
Hmlp001371	235.11	120.08	234.1	C12H14N2O3	[M+H]+	Cyclo(Tyr-Ala)	环(酪氨酸-丙氨酸)	Amino acids and derivatives	氨基酸及其衍生物	Amino acids and derivatives	氨基酸及其衍生物	21754-26-7	3	112641	88608.8	63599.4	191159	310354	265757	193442	161560	178627	-	-	1.18896	0.0272159	2.89701	1.53456	up
pma0170	498.26	177.05	497.253	C27H35N3O6	[M+H]+	N',N''-Diferuloylspermidine	N',N''-二阿魏酰亚精胺	Alkaloids	生物碱	Phenolamine	酚胺	-	3	320523	217327	141219	598163	584041	545230	362970	325692	390026	-	-	1.15652	0.015024	2.54383	1.347	up
Lmhp008233	474.26	333.24	473.254	C23H40NO7P	[M+H]+	LysoPE 18:4	溶血磷脂酰乙醇胺 18:4	Lipids	脂质	LPE	溶血磷脂酰乙醇胺	-	3	100217	99196.4	110625	232037	235094	156287	149946	159079	178836	-	-	1.18962	0.0532445	2.01078	1.00775	up
Lmhp005784	425.21	177.05	424.2	C24H28N2O5	[M+H]+	p-Coumaroylferuloylcadaverine	对香豆酰阿魏酰尸胺	Alkaloids	生物碱	Phenolamine	酚胺	-	3	43315.3	79060.5	49591	263695	282114	294457	198089	221126	184951	-	-	1.25213	0.000126812	4.88621	2.28872	up
pmn001411	315.11	135.05	316.116	C14H20O8	[M-H]-	Cornoside	梾木苷	Phenolic acids	酚酸类	Phenolic acids	酚酸类	40661-45-8	3	3.91228e+07	4.42421e+07	4.43883e+07	9.79621e+06	1.11077e+07	1.36352e+07	2.1356e+07	2.43808e+07	2.55406e+07	-	-	1.26793	0.000294462	0.270358	-1.88706	down
Zmjp010694	359.11	344.09	358.105	C19H18O7	[M+H]+	5-Hydroxy-3,7,3',4'-tetramethoxyflavone (Retusin)	5-羟基-3,7,3',4'-四甲氧基黄酮	Flavonoids	黄酮	Flavones	黄酮	1245-15-4	2	4811.62	10877.8	16306.3	24024.5	31429.7	32644.3	20911.9	24481.3	20956.9	-	-	1.07048	0.0130763	2.75344	1.46124	up
MWS201461	288.2	175.12	287.196	C12H25N5O3	[M+H]+	Leu-Arg	L-亮氨酸-L-精氨酸	Amino acids and derivatives	氨基酸及其衍生物	Amino acids and derivatives	氨基酸及其衍生物	26607-15-8	3	304404	244284	299711	1.36104e+06	1.3669e+06	1.31169e+06	912890	966776	1.09364e+06	-	-	1.27866	2.37721e-06	4.76148	2.25141	up
MWS0813	128.036	82.0295	129.043	C5H7NO3	[M-H]-	5-Oxoproline	5-氧化脯氨酸	Amino acids and derivatives	氨基酸及其衍生物	Amino acids and derivatives	氨基酸及其衍生物	149-87-1	3	65658.7	60698.8	77755.1	30888.8	31327.5	37822.1	38400.2	44201.7	46122.6	C02237	ko00470,ko01100	1.23808	0.0105322	0.490114	-1.02881	down
Zbln003676	385.13	205.05	386.137	C21H22O7	[M-H]-	7-hydroxy-4-methoxyphenanthrene-2-O-glucoside	7-羟基-4-甲氧基菲-2-O-β-D-葡萄糖	Quinones	醌类	PhenAnthraquinones	菲醌	-	2	343916	307261	325781	880266	1.00009e+06	994129	685688	759420	629956	-	-	1.27809	0.00221661	2.94228	1.55693	up
pmb3068	337.09	163.04	338.1	C16H18O8	[M-H]-	1-O-p-Coumaroylquinic acid	1-O-对香豆酰奎宁酸	Phenolic acids	酚酸类	Phenolic acids	酚酸类	-	3	668667	645813	688546	2.63095e+06	2.47057e+06	2.3266e+06	1.94853e+06	1.61145e+06	1.72004e+06	-	-	1.28168	0.00199409	3.70845	1.89082	up
pme3967	312.13	180.09	311.123	C12H17N5O5	[M+H]+	2-(Dimethylamino)guanosine*	2-(二甲基氨基)鸟苷*	Nucleotides and derivatives	核苷酸及其衍生物	Nucleotides and derivatives	核苷酸及其衍生物	2140-67-2	1	4.88308e+06	5.64798e+06	5.45623e+06	2.64684e+06	2.78792e+06	2.52537e+06	3.70615e+06	4.02572e+06	3.2986e+06	-	-	1.26985	0.00388363	0.497904	-1.00606	down
Hmbp002730	287.06	153.01	286.048	C15H10O6	[M+H]+	Isoscutellarein*	异野黄芩素*	Flavonoids	黄酮	Flavones	黄酮	41440-05-5	1	253278	198459	238436	558768	598776	609033	379025	346006	428473	C10097	-	1.26696	9.19117e-05	2.55961	1.35593	up
Wbmp003302	165.09	91.05	164.084	C10H12O2	[M+H]+	Frambinone	羟苯基丁酮	Others	其它类	Ketone compounds	酮类化合物	-	3	345214	349360	222402	1.19333e+06	1.21536e+06	960466	950042	757140	889064	-	-	1.24486	0.00305639	3.67421	1.87743	up
mws0572	126.07	109.04	125.059	C5H7N3O	[M+H]+	5-Methylcytosine	5-甲基胞嘧啶	Nucleotides and derivatives	核苷酸及其衍生物	Nucleotides and derivatives	核苷酸及其衍生物	554-01-8	3	383778	462355	364392	131560	149147	210617	324525	266933	266167	C02376	ko00240,ko01100	1.21345	0.00390321	0.405877	-1.30089	down
Lmrn003000	165.06	103.06	166.063	C9H10O3	[M-H]-	2-Hydroxy-3-phenylpropanoic acid	2-羟基-3-苯基丙酸	Phenolic acids	酚酸类	Phenolic acids	酚酸类	7326-19-4	3	68804.2	70870.2	67768.7	235973	253021	255105	161225	171768	135877	C05607	ko00360,ko00960,ko01100,ko01110	1.28299	0.00091685	3.587	1.84278	up
MWStz005	182.04	167.02	181.037	C8H7NO4	[M+H]+	2,7-Dihydroxy-1,4-benzoxazin-3(4H)-one (DHBOA)	2,7-二羟基-2H-1,4-苯并恶嗪-3(4H)-酮 (DHBOA)	Alkaloids	生物碱	Alkaloids	生物碱	69804-59-7	3	73107.5	91165.4	135491	214400	236975	214226	128665	160190	133682	-	-	1.17426	0.0126307	2.22042	1.15083	up
mws0875	179.05	76.02	178.041	C5H10N2O3S	[M+H]+	L-Cysteinyl-L-glycine	L-半胱氨酰-L-甘氨酸	Amino acids and derivatives	氨基酸及其衍生物	Amino acids and derivatives	氨基酸及其衍生物	19246-18-5	3	64598.1	107400	103857	322705	284411	425759	246803	195087	205772	C01419	ko00480,ko01100	1.22863	0.0188648	3.74427	1.90468	up
Lmrj002793	277.12	120.08	276.111	C14H16N2O4	[M+H]+	Cyclo(Phe-Glu)	环(苯丙氨酸-谷氨酸)	Amino acids and derivatives	氨基酸及其衍生物	Amino acids and derivatives	氨基酸及其衍生物	-	3	596239	469802	501201	230410	265146	258498	389211	349633	299921	-	-	1.25188	0.013866	0.481134	-1.05549	down
pmb0557	621.11	287.06	621.109	C27H25O17+	[M]+	Cyanidin-3-O-(3'',6''-O-dimalonyl)glucoside	矢车菊素-3-O-(3'',6''-O-二丙二酰)葡萄糖苷	Flavonoids	黄酮	Anthocyanidins	花青素	171828-60-7	3	16771.9	22563	46288.6	209286	228500	230773	134132	165452	132311	C16289	ko00942	1.23591	0.000111302	7.80812	2.96498	up
zjbp110829	283.1	107.05	282.089	C17H14O4	[M+H]+	6-hydroxy-2-[2-(4-hydroxyphenyl)ethyl]chromone	6-羟基-2-[2-(2-(4-羟苯基)乙基]色酮	Others	其它类	Chromone	色酮类	-	3	194980	215721	211687	85232.4	113125	27396	119191	154125	148940	-	-	1.03234	0.0285099	0.362721	-1.46307	down
MWS201424	246.15	86.1	245.138	C10H19N3O4	[M+H]+	Ile-Asn	L-异亮氨酸-L-天冬酰胺	Amino acids and derivatives	氨基酸及其衍生物	Amino acids and derivatives	氨基酸及其衍生物	59652-59-4	3	74680.5	70943	94068.4	160447	153070	170165	161709	127700	130500	-	-	1.24288	0.00126298	2.01793	1.01288	up
Hmbn005456	399.11	163.04	400.116	C21H20O8	[M-H]-	1-O-Caffeoyl-3-O-p-coumaroylglycerol*	1-O-咖啡酰-3-O-对香豆酰甘油*	Phenolic acids	酚酸类	Phenolic acids	酚酸类	-	2	278952	225443	243821	541798	621653	487490	333465	360132	433942	-	-	1.24917	0.00853281	2.2065	1.14176	up
Zmbn006408	399.11	163.04	400.116	C21H20O8	[M-H]-	1-O-p-Hydroxycinnamoyl-3-O-caffeoylglycerol*	1-O-对羟基肉桂酰基-3-O-咖啡酰甘油*	Phenolic acids	酚酸类	Phenolic acids	酚酸类	-	2	278952	225443	243821	541798	621653	487490	333465	360132	433942	-	-	1.24917	0.00853281	2.2065	1.14176	up
pme1119	269.09	137.05	268.081	C10H12N4O5	[M+H]+	Inosine	肌苷	Nucleotides and derivatives	核苷酸及其衍生物	Nucleotides and derivatives	核苷酸及其衍生物	58-63-9	3	42214.4	111723	42423.4	109359	156901	200228	139108	116258	106110	C00294	ko00230,ko01100,ko01232,ko02010	1.01484	0.0626773	2.37567	1.24833	up
pmb3079	300.05	96.97	301.056	C8H16NO9P	[M-H]-	N-Acetyl-D-glucosamine-1-phosphate	N-乙酰-D-葡萄糖胺-1-磷酸	Others	其它类	Saccharides	糖类	6866-69-9	2	573979	541374	406260	286360	230058	214400	503678	412514	386308	C04256	-	1.20154	0.0226527	0.480292	-1.05802	down
Lmhp009802	504.31	363.29	503.301	C25H46NO7P	[M+H]+	LysoPE 20:3(2n isomer)	溶血磷脂酰乙醇胺 20:3(2n异构)	Lipids	脂质	LPE	溶血磷脂酰乙醇胺	-	3	52013.3	47814.6	21772.7	89983.8	74297.9	86332	50599.4	59590.7	44892.3	-	-	1.04312	0.0278135	2.06096	1.04331	up
Hmcp005697	425.37	191.18	424.37	C30H48O	[M+H]+	Olean-13(18)-en-3-one (δ-Amyrenone)	齐墩果-13(18)-烯-3-酮 (δ-香树脂酮)	Terpenoids	萜类	Triterpene	三萜	20248-08-2	3	185152	177913	200835	75878.7	77523.5	63765.9	139672	126575	103848	-	-	1.27027	0.000360382	0.385118	-1.37663	down
Lmmp003487	639.12	287.05	638.112	C27H26O18	[M+H]+	Luteolin-7-O-glucuronide-(2→1)-glucuronide	木犀草素-7-O-葡萄糖醛酸苷(2→1)-葡萄糖醛酸苷	Flavonoids	黄酮	Flavones	黄酮	-	3	5044.04	42582.7	26273.1	351008	361845	289188	187376	139877	156190	-	-	1.1739	0.00140933	13.5594	3.76123	up
MWS5206	181.05	135.04	182.058	C9H10O4	[M-H]-	4-Hydroxyphenyllactic Acid*	4-羟苯基乳酸*	Phenolic acids	酚酸类	Phenolic acids	酚酸类	306-23-0	3	75921.3	67239	119314	303932	330918	287504	222576	246386	181942	C03672	-	1.23688	0.000565997	3.51407	1.81314	up
MWSHY0174	291.086	139.04	290.079	C15H14O6	[M+H]+	Epicatechin	表儿茶素	Flavonoids	黄酮	Flavanols	黄烷醇类	490-46-0	3	133012	108603	70715.7	22807.4	48657.5	58915.6	68822.7	50672.7	60545	C09727	ko00941,ko01100,ko01110	1.02577	0.0577575	0.417443	-1.26035	down
Sadp006908	415.14	177.06	414.131	C22H22O8	[M+H]+	3-P-Coumaroyl-1-Feruloylglycerol	3-P-香豆酰-1-阿魏酰甘油	Phenolic acids	酚酸类	Phenolic acids	酚酸类	-	1	237625	116401	190606	319789	857999	947363	431952	322130	325117	-	-	1.0894	0.110694	3.902	1.96421	up
MWS4285	89.02	71.02	90.0317	C3H6O3	[M-H]-	L-Lactic Acid	L-乳酸	Organic acids	有机酸	Organic acids	有机酸	79-33-4	3	21578.5	18949.5	21463.6	5070.63	8036.37	3043.98	20639.3	14232.9	21565.7	C00186	ko00010,ko00051,ko00620,ko00640,ko01100,ko01110	1.19283	0.00204929	0.260535	-1.94045	down
Lshp011103	462.31	338.19	461.304	C29H39N3O2	[M+H]+	Echinulin	海胆灵	Alkaloids	生物碱	Plumerane	吲哚类生物碱	1859-87-6	1	25628.3	49750.5	20089	7362.36	6778.97	4705.74	14933.1	19900.9	13096.4	-	-	1.19688	0.105945	0.197418	-2.34067	down
Smgp004575	465.1	303.05	464.096	C21H20O12	[M+H]+	Quercetin-5-O-β-D-glucoside	槲皮素-5-O-β-D-葡萄糖苷	Flavonoids	黄酮	Flavonols	黄酮醇	-	3	9	9	9	1.46981e+06	2.46974e+06	1.04218e+06	1.52034e+06	1.30786e+06	964492	-	-	1.28303	0.0591854	184508	17.4933	up
pmb2654	460.15	117.9	461.153	C19H27NO12	[M-H]-	Anthranilate-1-O-Sophoroside	邻氨基苯甲酸-1-O-槐糖苷	Phenolic acids	酚酸类	Phenolic acids	酚酸类	-	3	44129.4	44153.2	61509.2	190188	318608	202281	99531.6	61784.4	88457	-	-	1.24428	0.0423033	4.7471	2.24705	up
mws1526	359.13	197.08	358.126	C16H22O9	[M+H]+	Sweroside	獐牙菜苷	Terpenoids	萜类	Monoterpenoids	倍萜	14215-86-2	3	635893	627389	249711	9	9	9	710068	472111	757850	C17071	-	1.28205	0.0582358	1.78454e-05	-15.7741	down
Wagp001908	427.21	177.05	426.2	C20H30N2O8	[M+H]+	N-Feruloylputrescine N-glucoside	N-阿魏酰腐胺 N-葡萄糖苷	Alkaloids	生物碱	Phenolamine	酚胺	-	3	92165.9	88268	110762	41599.1	36133.1	44398.1	115048	76527.1	76713.6	-	-	1.25603	0.00869134	0.419409	-1.25357	down
Lmhp005872	455.22	177.05	454.21	C25H30N2O6	[M+H]+	Diferuloylcadaverine	二阿魏酰尸胺	Alkaloids	生物碱	Phenolamine	酚胺	-	3	8706.57	52652.3	17778.2	9	9	9	24268.5	40569.2	36922.7	-	-	1.27239	0.18784	0.00034118	-11.5172	down
Lmhp009890	546.36	184.07	545.348	C28H52NO7P	[M+H]+	LysoPC 20:3	溶血磷脂酰胆碱 20:3	Lipids	脂质	LPC	溶血磷脂酰胆碱	1199257-41-4	1	1.09983e+06	1.14431e+06	1.11185e+06	2.33557e+06	2.4342e+06	2.40114e+06	1.74879e+06	1.73093e+06	1.06692e+06	-	-	1.28293	5.99041e-05	2.13675	1.09542	up
Zmkp000654	305.11	143.06	304.102	C10H16O7N4	[M+H]+	Vicine	蚕豆苷	Alkaloids	生物碱	Alkaloids	生物碱	152-93-2	3	196217	160825	173432	352966	415535	334969	364181	263857	215857	C08437	-	1.24914	0.00779974	2.08016	1.05669	up
pmb0752	369.12	177.05	368.111	C17H20O9	[M+H]+	3-O-Feruloylquinic acid*	3-O-阿魏酰奎宁酸*	Phenolic acids	酚酸类	Phenolic acids	酚酸类	1899-29-2	1	1.05023e+06	836450	1.55261e+06	2.0345e+06	4.58769e+06	2.42716e+06	1.39813e+06	2.23158e+06	2.53428e+06	C02572	-	1.07496	0.134695	2.63117	1.3957	up
Lmbn004790	209.08	179.03	210.089	C11H14O4	[M-H]-	Methyl 3-(3-hydroxy-4-methoxyphenyl)propanoate*	3-羟基-4-甲氧基苯丙酸甲酯*	Phenolic acids	酚酸类	Phenolic acids	酚酸类	129150-61-4	3	89752.4	80208.5	94256.9	219554	165658	205991	213244	117819	165361	-	-	1.24736	0.016506	2.23756	1.16193	up
MWSslk093	173.04	92.05	172.031	C6H8N2O2S	[M+H]+	2-Aminobenzenesulfonamide	2-氨基苯磺酰胺	Alkaloids	生物碱	Alkaloids	生物碱	3306-62-5	3	4056.27	1770.12	1737.63	7319.08	8450.33	6150.95	4301.94	6399.51	7903.16	-	-	1.14066	0.00967161	2.89798	1.53505	up
Lmhp010040	504.31	363.29	503.301	C25H46NO7P	[M+H]+	LysoPE 20:3	溶血磷脂酰乙醇胺 20:3	Lipids	脂质	LPE	溶血磷脂酰乙醇胺	-	3	22105.9	24477.7	19308.6	62609.6	75029.4	63226.8	18731.4	36480.7	37192.1	-	-	1.26772	0.00377086	3.0484	1.60805	up
pmn001477	435.09	345	436.101	C20H20O11	[M-H]-	4-C-Glucose-1,3,6-trihydroxy-7-methoxyxanthone	4-C-葡萄糖-1,3,6-三羟基-7-甲氧基氧杂蒽酮	Flavonoids	黄酮	Other Flavonoids	其它类黄酮	-	3	49609.3	43353.4	54154	21084.5	13007	10757.1	25829.1	14796.1	32487.1	-	-	1.21491	0.00153563	0.30485	-1.71383	down
MWSHY0165	449.14	287.1	448.137	C22H24O10	[M+H]+	Isosakuranetin-7-O-glucoside (Isosakuranin)	异樱花素-7-O-葡萄糖苷 (异野樱黄苷)	Flavonoids	黄酮	Flavonols	黄酮醇	491-69-0	3	171584	270693	205377	9	9	9	149553	340126	210314	-	-	1.2837	0.0176772	4.16889e-05	-14.55	down
Lmzp002365	465.14	303.09	464.132	C22H24O11	[M+H]+	Hesperetin-7-O-glucoside	橙皮素-7-O-葡萄糖苷	Flavonoids	黄酮	Flavanones	二氢黄酮	31712-49-9	2	9	9	9	1.69282e+06	925113	1.99957e+06	1.78499e+06	1.85424e+06	696514	C16422	ko00941	1.2832	0.0405009	171019	17.3838	up
MWSmce598	829.28	325.11	828.275	C30H52O26	[M+H]+	Maltopentaose	麦芽五糖	Others	其它类	Saccharides	糖类	34620-76-3	3	7012.83	32291.5	19370.2	4128.58	3136.51	7262.3	4291.59	12667.3	10281.7	-	-	1.00218	0.178143	0.247593	-2.01396	down
