# Supplementary material for: Integration of transcriptome and metabolome analyses reveals sorghum roots responding to cadmium stress through regulation of the flavonoid biosynthesis pathway
Source: Front Plant Sci. 2023 Feb 23;14:1144265. doi: 10.3389/fpls.2023.1144265 (PMC9996021; doi:10.3389/fpls.2023.1144265)
Supplement: Supplementary Table 10 — List of DEGs and DEMs involved in the flavonoid biosynthesis pathway. [file Table_10.xlsx]

## Sheet: DEGs
ID	CK-1_fpkm	CK-2_fpkm	CK-3_fpkm	CD-1_fpkm	CD-2_fpkm	CD-3_fpkm	CK-1_count	CK-2_count	CK-3_count	CD-1_count	CD-2_count	CD-3_count	CK_vs_CD.log2FoldChange	CK_vs_CD.pvalue	CK_vs_CD.padj	CK_vs_CD.regulated	chr	start	end	strand	gene_name	gene_description	KEGG	KEGG pathway	NR	Swissprot	Tremble	KOG	GO	Pfam	TF-Family	TF-Category	TF-Classification
Sobic.010G066700.v3.2	9.0365	7.3731	6.8444	17.7747	14.5452	15.3178	714	633	507	1393	776	1173	1.03851	3.10196e-20	3.91576e-19	up	Chr10	5341284	5343838	+	Sobic.010G066700	--	K13065 shikimate O-hydroxycinnamoyltransferase [EC:2.3.1.133] | (RefSeq) hydroxycinnamoyltransferase 4 (A)	ko00940: Phenylpropanoid biosynthesis; ko00941: Flavonoid biosynthesis; ko00945: Stilbenoid, diarylheptanoid and gingerol biosynthesis; ko01100: Metabolic pathways; ko01110: Biosynthesis of secondary metabolites	hydroxycinnamoyltransferase 4 [Sorghum bicolor]	HCT4_ORYSJ RecName: Full=Hydroxycinnamoyltransferase 4 {ECO:0000305}; Short=OsHCT4 {ECO:0000303|PubMed:22285622}; EC=2.3.1.- {ECO:0000305}; AltName: Full=BAHD-like hydroxycinnamoyl transferase HCT4 {ECO:0000305}; AltName: Full=Glycerol hydroxycinnamoyl transferase {ECO:0000305};	C5Z5T7_SORBI SubName: Full=Uncharacterized protein {ECO:0000313|EMBL:EER87979.1};	At5g48930	GO:0016747,transferase activity, transferring acyl groups other than amino-acyl groups; GO:0003674,molecular_function; GO:0003824,catalytic activity; GO:0016740,transferase activity; GO:0016746,transferase activity, transferring acyl groups	PF02458.15:Transferase family	--	--	--
Sobic.010G066601.v3.2	2.5741	1.844	1.9591	6.4811	6.2645	6.2164	185	144	132	462	304	433	1.57511	3.84704e-28	7.33194e-27	up	Chr10	5323773	5326218	-	Sobic.010G066601	--	K13065 shikimate O-hydroxycinnamoyltransferase [EC:2.3.1.133] | (RefSeq) hydroxycinnamoyltransferase 4 (A)	ko00940: Phenylpropanoid biosynthesis; ko00941: Flavonoid biosynthesis; ko00945: Stilbenoid, diarylheptanoid and gingerol biosynthesis; ko01100: Metabolic pathways; ko01110: Biosynthesis of secondary metabolites	hydroxycinnamoyltransferase 4 [Sorghum bicolor]	HCT4_ORYSJ RecName: Full=Hydroxycinnamoyltransferase 4 {ECO:0000305}; Short=OsHCT4 {ECO:0000303|PubMed:22285622}; EC=2.3.1.- {ECO:0000305}; AltName: Full=BAHD-like hydroxycinnamoyl transferase HCT4 {ECO:0000305}; AltName: Full=Glycerol hydroxycinnamoyl transferase {ECO:0000305};	C5Z5T7_SORBI SubName: Full=Uncharacterized protein {ECO:0000313|EMBL:EER87979.1};	At5g48930	GO:0016747,transferase activity, transferring acyl groups other than amino-acyl groups; GO:0003674,molecular_function; GO:0003824,catalytic activity; GO:0016740,transferase activity; GO:0016746,transferase activity, transferring acyl groups	PF02458.15:Transferase family	--	--	--
Sobic.010G059900.v3.2	1.8449	2.4525	3.1704	5.9675	5.3127	5.552	72	104	116	231	140	210	1.18104	7.08903e-10	4.25759e-09	up	Chr10	4694980	4696915	+	Sobic.010G059900	--	K05278 flavonol synthase [EC:1.14.20.6] | (RefSeq) flavonol synthase/flavanone 3-hydroxylase (A)	ko00941: Flavonoid biosynthesis; ko01100: Metabolic pathways; ko01110: Biosynthesis of secondary metabolites	protein SRG1 [Sorghum bicolor]	SRG1_ARATH RecName: Full=Protein SRG1; Short=AtSRG1; AltName: Full=Protein SENESCENCE-RELATED GENE 1;	C5Z5D4_SORBI RecName: Full=Fe2OG dioxygenase domain-containing protein {ECO:0000259|PROSITE:PS51471};	At5g20400	GO:0046872,metal ion binding; GO:0016682,oxidoreductase activity, acting on diphenols and related substances as donors, oxygen as acceptor; GO:0010150,leaf senescence; GO:0003674,molecular_function; GO:0005488,binding; GO:0043167,ion binding; GO:0043169,cation binding; GO:0003824,catalytic activity; GO:0016491,oxidoreductase activity; GO:0016679,oxidoreductase activity, acting on diphenols and re…	PF03171.20:2OG-Fe(II) oxygenase superfamily	--	--	--
Sobic.008G144401.v3.2	3.6016	3.3627	2.7282	8.5254	5.9525	7.6747	138	140	98	324	154	285	1.20244	7.69395e-12	5.54241e-11	up	Chr08	57576875	57578202	-	Sobic.008G144401	--	K05280 flavonoid 3'-monooxygenase [EC:1.14.14.82] | (RefSeq) flavonoid 3'-monooxygenase (A)	ko00941: Flavonoid biosynthesis; ko00944: Flavone and flavonol biosynthesis; ko01100: Metabolic pathways; ko01110: Biosynthesis of secondary metabolites	cytochrome P450 81D11 [Sorghum bicolor]	CYQ32_CATRO RecName: Full=Cytochrome P450 81Q32 {ECO:0000303|PubMed:24710322}; Short=CrCYP81Q32 {ECO:0000303|PubMed:24710322}; EC=1.14.-.- {ECO:0000305};	A0A1Z5R6P7_SORBI SubName: Full=Uncharacterized protein {ECO:0000313|EMBL:OQU79438.1};	At1g66540	GO:0016021,integral component of membrane; GO:0020037,heme binding; GO:0005506,iron ion binding; GO:0004497,monooxygenase activity; GO:0016705,oxidoreductase activity, acting on paired donors, with incorporation or reduction of molecular oxygen; GO:0003674,molecular_function; GO:0005488,binding; GO:0046906,tetrapyrrole binding; GO:0097159,organic cyclic compound binding; GO:1901363,heterocyclic c…	PF00067.22:Cytochrome P450	--	--	--
Sobic.008G030100.v3.2	47.3611	46.7345	44.3029	127.033	107.869	122.081	1967	2109	1725	5233	3025	4914	1.37077	8.59061e-68	5.80435e-66	up	Chr08	2682955	2684386	+	Sobic.008G030100	--	K01859 chalcone isomerase [EC:5.5.1.6] | (RefSeq) probable chalcone--flavonone isomerase 3 (A)	ko00941: Flavonoid biosynthesis; ko01100: Metabolic pathways; ko01110: Biosynthesis of secondary metabolites	hypothetical protein SORBI_3008G030100 [Sorghum bicolor]	CHIL2_HUMLU RecName: Full=Chalcone isomerase-like protein 2 {ECO:0000303|PubMed:29760092}; Short=HlCHIL2 {ECO:0000303|PubMed:29760092}; EC=5.5.1.6 {ECO:0000250|UniProtKB:Q8VZW3};	A0A1B6PB28_SORBI RecName: Full=Chalcone-flavonone isomerase family protein {ECO:0000256|RuleBase:RU361158};	At5g05270	GO:0016872,intramolecular lyase activity; GO:0003674,molecular_function; GO:0003824,catalytic activity; GO:0016853,isomerase activity	PF02431.15:Chalcone-flavanone isomerase	--	--	--
Sobic.007G152600.v3.2	1.2712	1.5496	1.3797	0.6071	0.644	0.5062	114	151	116	54	39	44	-1.26363	3.44638e-08	1.74355e-07	down	Chr07	58505877	58508776	+	Sobic.007G152600	--	K13083 flavonoid 3',5'-hydroxylase [EC:1.14.14.81] | (RefSeq) flavonoid 3',5'-hydroxylase 1 (A)	ko00941: Flavonoid biosynthesis; ko00944: Flavone and flavonol biosynthesis; ko01110: Biosynthesis of secondary metabolites	cytochrome P450 76M5 [Sorghum bicolor]	C76M5_ORYSJ RecName: Full=Cytochrome P450 76M5 {ECO:0000305}; EC=1.14.14.122 {ECO:0000269|PubMed:22215681};	C5YM67_SORBI SubName: Full=Uncharacterized protein {ECO:0000313|EMBL:EES13978.1};	At2g45570	GO:0016021,integral component of membrane; GO:0016020,membrane; GO:0102597,3alpha-hydroxy-ent-sandaracopimardiene 9-beta-monooxygenase activity; GO:0020037,heme binding; GO:0005506,iron ion binding; GO:0004497,monooxygenase activity; GO:0016709,oxidoreductase activity, acting on paired donors, with incorporation or reduction of molecular oxygen, NAD(P)H as one donor, and incorporation of one atom…	PF00067.22:Cytochrome P450	--	--	--
Sobic.007G059100.v3.2	1.5098	1.431	1.346	2.5445	1.9023	4.3479	67	69	56	112	57	187	1.0541	9.05325e-05	0.000284469	up	Chr07	6171780	6176126	-	Sobic.007G059100	--	K22440 naringenin 7-O-methyltransferase [EC:2.1.1.232] | (RefSeq) naringenin 7-O-methyltransferase (A)	ko00941: Flavonoid biosynthesis; ko01110: Biosynthesis of secondary metabolites	eugenol O-methyltransferase-like [Sorghum bicolor]	OMT1_SORBI RecName: Full=Eugenol O-methyltransferase; EC=2.1.1.146; AltName: Full=O-methyltransferase 1; Short=SbOMT1;	A0A1B6PFV1_SORBI SubName: Full=Uncharacterized protein {ECO:0000313|EMBL:KXG24559.1};	At5g54160	GO:0050630,(iso)eugenol O-methyltransferase activity; GO:0008171,O-methyltransferase activity; GO:0046983,protein dimerization activity; GO:0102719,S-adenosyl-L-methionine:eugenol-O-methyltransferase activity; GO:0008757,S-adenosylmethionine-dependent methyltransferase activity; GO:0019438,aromatic compound biosynthetic process; GO:0032259,methylation; GO:0003674,molecular_function; GO:0003824,ca…	PF00891.18:O-methyltransferase domain	--	--	--
Sobic.007G058800.v3.2	11.2522	13.2862	9.5008	34.8143	32.5005	32.5879	523	671	414	1605	1020	1468	1.55407	1.06117e-50	4.4328e-49	up	Chr07	6103097	6107178	+	Sobic.007G058800	--	K22440 naringenin 7-O-methyltransferase [EC:2.1.1.232] | (RefSeq) naringenin 7-O-methyltransferase (A)	ko00941: Flavonoid biosynthesis; ko01110: Biosynthesis of secondary metabolites	eugenol O-methyltransferase-like [Sorghum bicolor]	OMT1_SORBI RecName: Full=Eugenol O-methyltransferase; EC=2.1.1.146; AltName: Full=O-methyltransferase 1; Short=SbOMT1;	C5YHU7_SORBI SubName: Full=Uncharacterized protein {ECO:0000313|EMBL:EES13432.1};	At5g54160	GO:0050630,(iso)eugenol O-methyltransferase activity; GO:0008171,O-methyltransferase activity; GO:0046983,protein dimerization activity; GO:0102719,S-adenosyl-L-methionine:eugenol-O-methyltransferase activity; GO:0008757,S-adenosylmethionine-dependent methyltransferase activity; GO:0019438,aromatic compound biosynthetic process; GO:0032259,methylation; GO:0003674,molecular_function; GO:0003824,ca…	PF00891.18:O-methyltransferase domain	--	--	--
Sobic.007G058600.v3.2	0.5117	0.7299	0.4366	2.4503	1.6292	2.0061	20	31	16	95	43	76	1.86404	7.20767e-09	3.90255e-08	up	Chr07	6066875	6073377	-	Sobic.007G058600	--	K22440 naringenin 7-O-methyltransferase [EC:2.1.1.232] | (RefSeq) naringenin 7-O-methyltransferase (A)	ko00941: Flavonoid biosynthesis; ko01110: Biosynthesis of secondary metabolites	eugenol O-methyltransferase-like [Sorghum bicolor]	OMT1_SORBI RecName: Full=Eugenol O-methyltransferase; EC=2.1.1.146; AltName: Full=O-methyltransferase 1; Short=SbOMT1;	A0A1Z5R879_SORBI SubName: Full=Uncharacterized protein {ECO:0000313|EMBL:OQU79974.1};	At5g54160	GO:0050630,(iso)eugenol O-methyltransferase activity; GO:0008171,O-methyltransferase activity; GO:0046983,protein dimerization activity; GO:0102719,S-adenosyl-L-methionine:eugenol-O-methyltransferase activity; GO:0008757,S-adenosylmethionine-dependent methyltransferase activity; GO:0019438,aromatic compound biosynthetic process; GO:0032259,methylation; GO:0003674,molecular_function; GO:0003824,ca…	PF00891.18:O-methyltransferase domain	--	--	--
Sobic.007G058400.v3.2	2.5243	1.8425	2.414	3.7955	5.0598	5.0519	116	92	104	173	157	225	1.03552	3.32535e-08	1.6846e-07	up	Chr07	6021034	6029688	-	Sobic.007G058400	--	K22440 naringenin 7-O-methyltransferase [EC:2.1.1.232] | (RefSeq) naringenin 7-O-methyltransferase (A)	ko00941: Flavonoid biosynthesis; ko01110: Biosynthesis of secondary metabolites	eugenol O-methyltransferase [Sorghum bicolor]	OMT1_SORBI RecName: Full=Eugenol O-methyltransferase; EC=2.1.1.146; AltName: Full=O-methyltransferase 1; Short=SbOMT1;	A0A1B6PFT6_SORBI SubName: Full=Uncharacterized protein {ECO:0000313|EMBL:KXG24554.1};	At5g54160	GO:0050630,(iso)eugenol O-methyltransferase activity; GO:0008171,O-methyltransferase activity; GO:0046983,protein dimerization activity; GO:0102719,S-adenosyl-L-methionine:eugenol-O-methyltransferase activity; GO:0008757,S-adenosylmethionine-dependent methyltransferase activity; GO:0019438,aromatic compound biosynthetic process; GO:0032259,methylation; GO:0003674,molecular_function; GO:0003824,ca…	PF00891.18:O-methyltransferase domain	--	--	--
Sobic.006G226800.v3.2	7.1885	9.0621	6.7801	17.8506	16.0548	15.3588	311	426	275	766	469	644	1.09811	7.47947e-20	9.25425e-19	up	Chr06	57175962	57178219	+	Sobic.006G226800	--	K08695 anthocyanidin reductase [EC:1.3.1.77] | (RefSeq) anthocyanidin reductase ((2S)-flavan-3-ol-forming)-like (A)	ko00941: Flavonoid biosynthesis; ko01100: Metabolic pathways; ko01110: Biosynthesis of secondary metabolites	hypothetical protein SORBI_3006G226800 [Sorghum bicolor]	ANRCS_VITVI RecName: Full=Anthocyanidin reductase ((2S)-flavan-3-ol-forming) {ECO:0000303|Ref.1}; Short=VvANR {ECO:0000303|Ref.1}; EC=1.3.1.112 {ECO:0000269|PubMed:20030585, ECO:0000269|Ref.1};	C5YGL7_SORBI SubName: Full=3-deoxyanthocyanidin synthase {ECO:0000313|EMBL:BAU68557.1};	At1g61720	GO:0033729,anthocyanidin reductase activity; GO:0050661,NADP binding; GO:0016854,racemase and epimerase activity; GO:0009813,flavonoid biosynthetic process; GO:0003674,molecular_function; GO:0003824,catalytic activity; GO:0016491,oxidoreductase activity; GO:0016627,oxidoreductase activity, acting on the CH-CH group of donors; GO:0016628,oxidoreductase activity, acting on the CH-CH group of donors…	PF01370.21:NAD dependent epimerase/dehydratase family	--	--	--
Sobic.006G209300.v3.2	1.3638	1.9488	1.2059	5.9161	5.9797	6.4249	76	118	63	327	225	347	2.01565	2.23609e-31	4.83703e-30	up	Chr06	55912179	55914213	+	Sobic.006G209300	--	K13065 shikimate O-hydroxycinnamoyltransferase [EC:2.3.1.133] | (RefSeq) putrescine hydroxycinnamoyltransferase 1 (A)	ko00940: Phenylpropanoid biosynthesis; ko00941: Flavonoid biosynthesis; ko00945: Stilbenoid, diarylheptanoid and gingerol biosynthesis; ko01100: Metabolic pathways; ko01110: Biosynthesis of secondary metabolites	hydroxycinnamoyltransferase 4 [Sorghum bicolor]	CFAT_PETHY RecName: Full=Coniferyl alcohol acyltransferase {ECO:0000303|PubMed:17241449}; Short=PhCFAT {ECO:0000303|PubMed:17241449}; EC=2.3.1.- {ECO:0000269|PubMed:17241449}; AltName: Full=(E)-cinnamyl alcohol acyltransferase {ECO:0000303|PubMed:17241449}; EC=2.3.1.224 {ECO:0000269|PubMed:17241449}; AltName: Full=(E)-sinapoyl alcohol acyltransferase {ECO:0000303|PubMed:17241449}; EC=2.3.1.- {ECO…	C5YFL5_SORBI SubName: Full=Uncharacterized protein {ECO:0000313|EMBL:EES11396.1};	At1g32910	GO:0102387,2-phenylethanol acetyltransferase activity; GO:0102720,acetyl-coenzyme A:acetyl alcohol acetyltransferase activity; GO:0034318,alcohol O-acyltransferase activity; GO:0007623,circadian rhythm; GO:0010597,green leaf volatile biosynthetic process; GO:0009699,phenylpropanoid biosynthetic process; GO:0009723,response to ethylene; GO:0003674,molecular_function; GO:0003824,catalytic activity;…	PF02458.15:Transferase family	--	--	--
Sobic.006G209000.v3.2	10.5038	12.4172	9.8719	44.2711	32.7637	39.3245	471	605	415	1969	992	1709	1.83245	8.72092e-57	4.40603e-55	up	Chr06	55890212	55893825	+	Sobic.006G209000	--	K13065 shikimate O-hydroxycinnamoyltransferase [EC:2.3.1.133] | (RefSeq) putrescine hydroxycinnamoyltransferase 1 (A)	ko00940: Phenylpropanoid biosynthesis; ko00941: Flavonoid biosynthesis; ko00945: Stilbenoid, diarylheptanoid and gingerol biosynthesis; ko01100: Metabolic pathways; ko01110: Biosynthesis of secondary metabolites	shikimate O-hydroxycinnamoyltransferase [Sorghum bicolor]	CFAT_PETHY RecName: Full=Coniferyl alcohol acyltransferase {ECO:0000303|PubMed:17241449}; Short=PhCFAT {ECO:0000303|PubMed:17241449}; EC=2.3.1.- {ECO:0000269|PubMed:17241449}; AltName: Full=(E)-cinnamyl alcohol acyltransferase {ECO:0000303|PubMed:17241449}; EC=2.3.1.224 {ECO:0000269|PubMed:17241449}; AltName: Full=(E)-sinapoyl alcohol acyltransferase {ECO:0000303|PubMed:17241449}; EC=2.3.1.- {ECO…	C5YFL2_SORBI SubName: Full=Uncharacterized protein {ECO:0000313|EMBL:EES11393.1};	At1g78990	GO:0102387,2-phenylethanol acetyltransferase activity; GO:0102720,acetyl-coenzyme A:acetyl alcohol acetyltransferase activity; GO:0034318,alcohol O-acyltransferase activity; GO:0007623,circadian rhythm; GO:0010597,green leaf volatile biosynthetic process; GO:0009699,phenylpropanoid biosynthetic process; GO:0009723,response to ethylene; GO:0003674,molecular_function; GO:0003824,catalytic activity;…	PF02458.15:Transferase family	--	--	--
Sobic.005G224400.v3.2	40.9119	39.9676	39.1537	2.6844	2.1484	2.6715	2228	2365	1999	145	79	141	-3.9787	3.16476e-297	4.43699e-294	down	Chr05	71126761	71129300	+	Sobic.005G224400	--	K22440 naringenin 7-O-methyltransferase [EC:2.1.1.232] | (RefSeq) naringenin 7-O-methyltransferase (A)	ko00941: Flavonoid biosynthesis; ko01110: Biosynthesis of secondary metabolites	RecName: Full=Probable O-methyltransferase 2; Short=SbOMT2 ABP01562.1 O-methyltransferase 2 [Sorghum bicolor]	OMT2_SORBI RecName: Full=Probable O-methyltransferase 2; Short=SbOMT2; EC=2.1.1.-;	C5Y8F7_SORBI SubName: Full=Uncharacterized protein {ECO:0000313|EMBL:EES09017.2};	At4g35160	GO:0008171,O-methyltransferase activity; GO:0046983,protein dimerization activity; GO:0008757,S-adenosylmethionine-dependent methyltransferase activity; GO:0019438,aromatic compound biosynthetic process; GO:0032259,methylation; GO:0003674,molecular_function; GO:0003824,catalytic activity; GO:0008168,methyltransferase activity; GO:0016740,transferase activity; GO:0016741,transferase activity, tran…	PF00891.18:O-methyltransferase domain	--	--	--
Sobic.005G216200.v3.2	1.164	1.2855	1.4403	4.3657	3.2065	3.2428	50	60	58	186	93	135	1.48604	2.46898e-11	1.70691e-10	up	Chr05	70193906	70195403	+	Sobic.005G216200	--	K22440 naringenin 7-O-methyltransferase [EC:2.1.1.232] | (RefSeq) naringenin 7-O-methyltransferase (A)	ko00941: Flavonoid biosynthesis; ko01110: Biosynthesis of secondary metabolites	acetylserotonin O-methyltransferase 1 [Sorghum bicolor]	ASMT1_ORYSJ RecName: Full=Acetylserotonin O-methyltransferase 1 {ECO:0000305}; Short=OsASMT1 {ECO:0000303|PubMed:24134674}; EC=2.1.1.4 {ECO:0000269|PubMed:21210840};	C5Y7Z4_SORBI SubName: Full=Uncharacterized protein {ECO:0000313|EMBL:EES08973.1};	At4g35160	GO:0005737,cytoplasm; GO:0017096,acetylserotonin O-methyltransferase activity; GO:0008171,O-methyltransferase activity; GO:0046983,protein dimerization activity; GO:0008757,S-adenosylmethionine-dependent methyltransferase activity; GO:0019438,aromatic compound biosynthetic process; GO:0030187,melatonin biosynthetic process; GO:0032259,methylation; GO:0003674,molecular_function; GO:0003824,catalyt…	PF00891.18:O-methyltransferase domain	--	--	--
Sobic.005G216100.v3.2	0.8728	1.0776	0.931	2.8331	2.4276	1.7352	41	55	41	132	77	79	1.27852	6.98108e-07	3.01424e-06	up	Chr05	70183815	70185442	-	Sobic.005G216100	--	K22440 naringenin 7-O-methyltransferase [EC:2.1.1.232] | (RefSeq) naringenin 7-O-methyltransferase (A)	ko00941: Flavonoid biosynthesis; ko01110: Biosynthesis of secondary metabolites	acetylserotonin O-methyltransferase 1 [Sorghum bicolor]	ASMT1_ORYSJ RecName: Full=Acetylserotonin O-methyltransferase 1 {ECO:0000305}; Short=OsASMT1 {ECO:0000303|PubMed:24134674}; EC=2.1.1.4 {ECO:0000269|PubMed:21210840};	C5Y7Z2_SORBI SubName: Full=Uncharacterized protein {ECO:0000313|EMBL:EES10259.1};	At4g35160	GO:0005737,cytoplasm; GO:0017096,acetylserotonin O-methyltransferase activity; GO:0008171,O-methyltransferase activity; GO:0046983,protein dimerization activity; GO:0008757,S-adenosylmethionine-dependent methyltransferase activity; GO:0019438,aromatic compound biosynthetic process; GO:0030187,melatonin biosynthetic process; GO:0032259,methylation; GO:0003674,molecular_function; GO:0003824,catalyt…	PF00891.18:O-methyltransferase domain	--	--	--
Sobic.005G149600.v3.2	5.1725	4.9447	4.396	15.2411	11.8614	15.219	310	322	247	906	480	884	1.55119	5.60253e-36	1.46475e-34	up	Chr05	61802958	61804940	-	Sobic.005G149600	--	K05280 flavonoid 3'-monooxygenase [EC:1.14.14.82] | (RefSeq) flavonoid 3'-monooxygenase (A)	ko00941: Flavonoid biosynthesis; ko00944: Flavone and flavonol biosynthesis; ko01100: Metabolic pathways; ko01110: Biosynthesis of secondary metabolites	hypothetical protein SORBI_3005G149600 [Sorghum bicolor]	C76BA_SWEMU RecName: Full=Geraniol 8-hydroxylase; EC=1.14.14.83 {ECO:0000269|PubMed:20699579}; AltName: Full=Cytochrome P450 76B10; AltName: Full=Geraniol 10-hydroxylase; Short=SmG10H;	A0A1Z5RIS1_SORBI SubName: Full=Uncharacterized protein {ECO:0000313|EMBL:OQU83634.1};	At2g45570	GO:0005789,endoplasmic reticulum membrane; GO:0016021,integral component of membrane; GO:0102811,geraniol 10-hydroxylase activity; GO:0020037,heme binding; GO:0005506,iron ion binding; GO:0016709,oxidoreductase activity, acting on paired donors, with incorporation or reduction of molecular oxygen, NAD(P)H as one donor, and incorporation of one atom of oxygen; GO:0016099,monoterpenoid biosynthetic…	PF00067.22:Cytochrome P450	--	--	--
Sobic.005G137100.v3.2	8.2495	9.1907	6.969	16.7804	16.0451	17.4504	399	483	316	805	524	818	1.04435	3.16344e-21	4.19647e-20	up	Chr05	58942061	58943887	-	Sobic.005G137100	--	K00660 chalcone synthase [EC:2.3.1.74] | (RefSeq) chalcone synthase 3 (A)	ko00941: Flavonoid biosynthesis; ko00960: Tropane, piperidine and pyridine alkaloid biosynthesis; ko01100: Metabolic pathways; ko01110: Biosynthesis of secondary metabolites; ko04712: Circadian rhythm - plant	chalcone synthase 3 [Sorghum bicolor]	CHS3_SORBI RecName: Full=Chalcone synthase 3; EC=2.3.1.74; AltName: Full=Naringenin-chalcone synthase 3;	C5Y3Q1_SORBI SubName: Full=Uncharacterized protein {ECO:0000313|EMBL:EES09863.1};	At5g13930	GO:0016210,naringenin-chalcone synthase activity; GO:0009813,flavonoid biosynthetic process; GO:0003674,molecular_function; GO:0003824,catalytic activity; GO:0016740,transferase activity; GO:0016746,transferase activity, transferring acyl groups; GO:0016747,transferase activity, transferring acyl groups other than amino-acyl groups; GO:0008150,biological_process; GO:0008152,metabolic process; GO:…	PF00195.19:Chalcone and stilbene synthases, N-terminal domain	--	--	--
Sobic.005G137000.v3.2	8.8998	10.9624	7.6397	21.2545	19.6708	22.0108	461	617	371	1092	688	1105	1.19671	1.51868e-25	2.56529e-24	up	Chr05	58925899	58927778	-	Sobic.005G137000	--	K00660 chalcone synthase [EC:2.3.1.74] | (RefSeq) chalcone synthase 1 (A)	ko00941: Flavonoid biosynthesis; ko00960: Tropane, piperidine and pyridine alkaloid biosynthesis; ko01100: Metabolic pathways; ko01110: Biosynthesis of secondary metabolites; ko04712: Circadian rhythm - plant	chalcone synthase 1 [Sorghum bicolor]	CHS1_SORBI RecName: Full=Chalcone synthase 1; EC=2.3.1.74; AltName: Full=Naringenin-chalcone synthase 1;	C5Y3Q0_SORBI SubName: Full=Uncharacterized protein {ECO:0000313|EMBL:EES09862.1};	At5g13930	GO:0016210,naringenin-chalcone synthase activity; GO:0009813,flavonoid biosynthetic process; GO:0003674,molecular_function; GO:0003824,catalytic activity; GO:0016740,transferase activity; GO:0016746,transferase activity, transferring acyl groups; GO:0016747,transferase activity, transferring acyl groups other than amino-acyl groups; GO:0008150,biological_process; GO:0008152,metabolic process; GO:…	PF00195.19:Chalcone and stilbene synthases, N-terminal domain	--	--	--
Sobic.005G136300.v3.2	14.3102	16.6753	13.3906	49.5086	41.2641	44.3911	774	980	679	2656	1507	2327	1.61027	2.14452e-63	1.26928e-61	up	Chr05	58879892	58882287	-	Sobic.005G136300	--	K00660 chalcone synthase [EC:2.3.1.74] | (RefSeq) chalcone synthase 4 (A)	ko00941: Flavonoid biosynthesis; ko00960: Tropane, piperidine and pyridine alkaloid biosynthesis; ko01100: Metabolic pathways; ko01110: Biosynthesis of secondary metabolites; ko04712: Circadian rhythm - plant	chalcone synthase 4 [Sorghum bicolor]	CHS4_SORBI RecName: Full=Chalcone synthase 4; EC=2.3.1.74; AltName: Full=Naringenin-chalcone synthase 4;	C5Y3P6_SORBI SubName: Full=Uncharacterized protein {ECO:0000313|EMBL:EES09858.1};	At5g13930	GO:0016210,naringenin-chalcone synthase activity; GO:0009813,flavonoid biosynthetic process; GO:0003674,molecular_function; GO:0003824,catalytic activity; GO:0016740,transferase activity; GO:0016746,transferase activity, transferring acyl groups; GO:0016747,transferase activity, transferring acyl groups other than amino-acyl groups; GO:0008150,biological_process; GO:0008152,metabolic process; GO:…	PF00195.19:Chalcone and stilbene synthases, N-terminal domain	--	--	--
Sobic.004G200900.v3.2	0.901	0.7555	0.5553	2.9675	2.5205	2.3138	45	41	26	147	85	112	1.81871	4.72353e-13	3.79915e-12	up	Chr04	55233583	55236702	+	Sobic.004G200900	--	K05280 flavonoid 3'-monooxygenase [EC:1.14.14.82] | (RefSeq) flavonoid 3'-monooxygenase (A)	ko00941: Flavonoid biosynthesis; ko00944: Flavone and flavonol biosynthesis; ko01100: Metabolic pathways; ko01110: Biosynthesis of secondary metabolites	flavonoid 3'-monooxygenase [Sorghum bicolor]	C75B3_ORYSJ RecName: Full=Flavonoid 3'-monooxygenase CYP75B3 {ECO:0000305}; EC=1.14.14.82 {ECO:0000305|PubMed:18726614}; AltName: Full=Cytochrome P450 75B3 {ECO:0000303|PubMed:26082402}; AltName: Full=Flavonoid 3'-hydroxylase {ECO:0000303|PubMed:18726614}; Short=OsF3'H {ECO:0000303|PubMed:18726614};	C5XWI3_SORBI SubName: Full=Uncharacterized protein {ECO:0000313|EMBL:EES05361.1};	At5g07990	GO:0016021,integral component of membrane; GO:0016711,flavonoid 3'-monooxygenase activity; GO:0020037,heme binding; GO:0005506,iron ion binding; GO:0009813,flavonoid biosynthetic process; GO:0003674,molecular_function; GO:0003824,catalytic activity; GO:0004497,monooxygenase activity; GO:0016491,oxidoreductase activity; GO:0016705,oxidoreductase activity, acting on paired donors, with incorporatio…	PF00067.22:Cytochrome P450	--	--	--
Sobic.004G200800.v3.2	0.0573	0.2214	0.1222	0.4273	0.2545	0.4373	5	21	10	37	15	37	1.49195	0.00237706	0.00573525	up	Chr04	55221099	55224686	+	Sobic.004G200800	--	K05280 flavonoid 3'-monooxygenase [EC:1.14.14.82] | (RefSeq) flavonoid 3'-monooxygenase (A)	ko00941: Flavonoid biosynthesis; ko00944: Flavone and flavonol biosynthesis; ko01100: Metabolic pathways; ko01110: Biosynthesis of secondary metabolites	flavonoid 3'-monooxygenase [Sorghum bicolor]	C75B3_ORYSJ RecName: Full=Flavonoid 3'-monooxygenase CYP75B3 {ECO:0000305}; EC=1.14.14.82 {ECO:0000305|PubMed:18726614}; AltName: Full=Cytochrome P450 75B3 {ECO:0000303|PubMed:26082402}; AltName: Full=Flavonoid 3'-hydroxylase {ECO:0000303|PubMed:18726614}; Short=OsF3'H {ECO:0000303|PubMed:18726614};	C5XWH8_SORBI SubName: Full=Uncharacterized protein {ECO:0000313|EMBL:EES05356.1};	At5g07990	GO:0016021,integral component of membrane; GO:0016711,flavonoid 3'-monooxygenase activity; GO:0020037,heme binding; GO:0005506,iron ion binding; GO:0009813,flavonoid biosynthetic process; GO:0003674,molecular_function; GO:0003824,catalytic activity; GO:0004497,monooxygenase activity; GO:0016491,oxidoreductase activity; GO:0016705,oxidoreductase activity, acting on paired donors, with incorporatio…	PF00067.22:Cytochrome P450	--	--	--
Sobic.004G108200.v3.2	1.7379	1.2464	1.3296	6.9481	6.1594	6.7892	145	113	104	575	347	549	2.21156	1.27449e-52	5.74082e-51	up	Chr04	10400838	10403640	+	Sobic.004G108200	--	K23180 flavone synthase II [EC:1.14.19.76] | (RefSeq) 3,9-dihydroxypterocarpan 6A-monooxygenase (A)	ko00941: Flavonoid biosynthesis; ko01100: Metabolic pathways; ko01110: Biosynthesis of secondary metabolites	cytochrome P450 93A3 [Sorghum bicolor]	C93G1_ORYSJ RecName: Full=Cytochrome P450 93G1 {ECO:0000303|PubMed:24843076}; EC=1.14.19.76 {ECO:0000269|PubMed:24843076}; AltName: Full=Flavone synthase II {ECO:0000303|PubMed:24843076}; Short=OsFNSII {ECO:0000303|PubMed:24843076};	C5XZ13_SORBI SubName: Full=Uncharacterized protein {ECO:0000313|EMBL:EES04838.1};	At5g06900	GO:0016021,integral component of membrane; GO:0016020,membrane; GO:0020037,heme binding; GO:0005506,iron ion binding; GO:0016709,oxidoreductase activity, acting on paired donors, with incorporation or reduction of molecular oxygen, NAD(P)H as one donor, and incorporation of one atom of oxygen; GO:0016717,oxidoreductase activity, acting on paired donors, with oxidation of a pair of donors resultin…	PF00067.22:Cytochrome P450	--	--	--
Sobic.003G337400.v3.2	0.296	0.3114	0.3609	0.9238	1.0021	0.4945	21	24	24	65	48	34	1.31252	0.000220436	0.000647143	up	Chr03	66049426	66052170	-	Sobic.003G337400	--	K00487 trans-cinnamate 4-monooxygenase [EC:1.14.14.91] | (RefSeq) trans-cinnamate 4-monooxygenase (A)	ko00130: Ubiquinone and other terpenoid-quinone biosynthesis; ko00940: Phenylpropanoid biosynthesis; ko00941: Flavonoid biosynthesis; ko00945: Stilbenoid, diarylheptanoid and gingerol biosynthesis; ko01100: Metabolic pathways; ko01110: Biosynthesis of secondary metabolites	trans-cinnamate 4-monooxygenase [Sorghum bicolor]	TCMO_CATRO RecName: Full=Trans-cinnamate 4-monooxygenase; EC=1.14.14.91 {ECO:0000250|UniProtKB:Q04468}; AltName: Full=Cinnamic acid 4-hydroxylase; Short=C4H; Short=CA4H; AltName: Full=Cytochrome P450 73; AltName: Full=Cytochrome P450C4H;	C5XN98_SORBI SubName: Full=Uncharacterized protein {ECO:0000313|EMBL:EES03803.1};	At2g30490	GO:0016021,integral component of membrane; GO:0020037,heme binding; GO:0005506,iron ion binding; GO:0016710,trans-cinnamate 4-monooxygenase activity; GO:0003674,molecular_function; GO:0005488,binding; GO:0046906,tetrapyrrole binding; GO:0097159,organic cyclic compound binding; GO:1901363,heterocyclic compound binding; GO:0043167,ion binding; GO:0043169,cation binding; GO:0046872,metal ion binding…	PF00067.22:Cytochrome P450	--	--	--
Sobic.003G298500.v3.2	0.2993	0.3804	0.3344	0.8477	0.7809	0.7499	21	29	22	59	37	51	1.2318	0.000172921	0.000517401	up	Chr03	62987674	62990040	+	Sobic.003G298500	--	K22440 naringenin 7-O-methyltransferase [EC:2.1.1.232] | (RefSeq) naringenin 7-O-methyltransferase (A)	ko00941: Flavonoid biosynthesis; ko01110: Biosynthesis of secondary metabolites	trans-resveratrol di-O-methyltransferase [Sorghum bicolor]	ROMT_VITVI RecName: Full=Trans-resveratrol di-O-methyltransferase; EC=2.1.1.240; AltName: Full=Resveratrol O-methyltransferase; Short=ROMT; Short=VvROMT;	A0A1B6Q646_SORBI SubName: Full=Uncharacterized protein {ECO:0000313|EMBL:KXG33383.1};	At4g35160	GO:0008171,O-methyltransferase activity; GO:0046983,protein dimerization activity; GO:0102303,resveratrol 3,5-O-dimethyltransferase activity; GO:0008757,S-adenosylmethionine-dependent methyltransferase activity; GO:0019438,aromatic compound biosynthetic process; GO:0032259,methylation; GO:0003674,molecular_function; GO:0003824,catalytic activity; GO:0008168,methyltransferase activity; GO:0016740,…	PF00891.18:O-methyltransferase domain	--	--	--
Sobic.002G366200.v3.2	5.1382	5.4006	5.2178	20.8552	18.7434	19.8272	542	619	516	2182	1335	2027	1.91875	1.81979e-115	3.2398e-113	up	Chr02	72610906	72616546	-	Sobic.002G366200	--	K13082 bifunctional dihydroflavonol 4-reductase/flavanone 4-reductase [EC:1.1.1.219 1.1.1.234] | (RefSeq) dihydroflavonol 4-reductase (A)	ko00941: Flavonoid biosynthesis; ko01100: Metabolic pathways; ko01110: Biosynthesis of secondary metabolites	putative anthocyanidin reductase isoform X1 [Sorghum bicolor]	ANR_GINBI RecName: Full=Putative anthocyanidin reductase {ECO:0000303|PubMed:16399014}; Short=GbANR {ECO:0000303|PubMed:16399014}; EC=1.3.1.- {ECO:0000250|UniProtKB:Q5FB34};	C5XDT9_SORBI RecName: Full=Epimerase domain-containing protein {ECO:0000259|Pfam:PF01370};	At3g15310	GO:0016491,oxidoreductase activity; GO:0009813,flavonoid biosynthetic process; GO:0003674,molecular_function; GO:0003824,catalytic activity; GO:0008150,biological_process; GO:0008152,metabolic process; GO:0009058,biosynthetic process; GO:0009812,flavonoid metabolic process; GO:0071704,organic substance metabolic process; GO:1901576,organic substance biosynthetic process	PF01370.21:NAD dependent epimerase/dehydratase family	--	--	--
Sobic.002G366100.v3.2	0.4227	0.1795	0.2948	0.8523	0.5056	0.9058	26	12	17	52	21	54	1.36089	0.000719449	0.00192931	up	Chr02	72605518	72608991	-	Sobic.002G366100	--	K13082 bifunctional dihydroflavonol 4-reductase/flavanone 4-reductase [EC:1.1.1.219 1.1.1.234] | (RefSeq) dihydroflavonol 4-reductase (A)	ko00941: Flavonoid biosynthesis; ko01100: Metabolic pathways; ko01110: Biosynthesis of secondary metabolites	hypothetical protein SORBI_3002G366100 [Sorghum bicolor]	ANR_GINBI RecName: Full=Putative anthocyanidin reductase {ECO:0000303|PubMed:16399014}; Short=GbANR {ECO:0000303|PubMed:16399014}; EC=1.3.1.- {ECO:0000250|UniProtKB:Q5FB34};	A0A1B6QFD1_SORBI RecName: Full=Epimerase domain-containing protein {ECO:0000259|Pfam:PF01370};	At1g61720	GO:0016491,oxidoreductase activity; GO:0009813,flavonoid biosynthetic process; GO:0003674,molecular_function; GO:0003824,catalytic activity; GO:0008150,biological_process; GO:0008152,metabolic process; GO:0009058,biosynthetic process; GO:0009812,flavonoid metabolic process; GO:0071704,organic substance metabolic process; GO:1901576,organic substance biosynthetic process	PF01370.21:NAD dependent epimerase/dehydratase family	--	--	--
Sobic.002G108400.v3.2	2.2869	1.7557	2.4646	7.2037	6.2122	6.4676	193	161	195	603	354	529	1.61967	1.82282e-31	3.95449e-30	up	Chr02	13119364	13125889	-	Sobic.002G108400	--	K05280 flavonoid 3'-monooxygenase [EC:1.14.14.82] | (RefSeq) flavonoid 3'-monooxygenase (A)	ko00941: Flavonoid biosynthesis; ko00944: Flavone and flavonol biosynthesis; ko01100: Metabolic pathways; ko01110: Biosynthesis of secondary metabolites	geraniol 8-hydroxylase [Sorghum bicolor]	C76BA_SWEMU RecName: Full=Geraniol 8-hydroxylase; EC=1.14.14.83 {ECO:0000269|PubMed:20699579}; AltName: Full=Cytochrome P450 76B10; AltName: Full=Geraniol 10-hydroxylase; Short=SmG10H;	C5X3M5_SORBI SubName: Full=Uncharacterized protein {ECO:0000313|EMBL:EER98370.1};	At2g45580	GO:0005789,endoplasmic reticulum membrane; GO:0016021,integral component of membrane; GO:0102811,geraniol 10-hydroxylase activity; GO:0020037,heme binding; GO:0005506,iron ion binding; GO:0016709,oxidoreductase activity, acting on paired donors, with incorporation or reduction of molecular oxygen, NAD(P)H as one donor, and incorporation of one atom of oxygen; GO:0016099,monoterpenoid biosynthetic…	PF00067.22:Cytochrome P450	--	--	--
Sobic.001G354400.v3.2	0.9364	0.9718	1.0626	2.2498	1.859	2.2202	47	53	50	112	63	108	1.1028	3.79332e-06	1.48451e-05	up	Chr01	64421142	64422928	-	Sobic.001G354400	--	K22440 naringenin 7-O-methyltransferase [EC:2.1.1.232] | (RefSeq) naringenin 7-O-methyltransferase (A)	ko00941: Flavonoid biosynthesis; ko01110: Biosynthesis of secondary metabolites	5-pentadecatrienyl resorcinol O-methyltransferase-like [Sorghum bicolor]	OMT3_SORBI RecName: Full=5-pentadecatrienyl resorcinol O-methyltransferase; EC=2.1.1.n7; AltName: Full=O-methyltransferase 3; Short=SbOMT3;	C5WYJ6_SORBI SubName: Full=Uncharacterized protein {ECO:0000313|EMBL:EER94773.2};	At4g35160	GO:0102990,5-n-alk(en)ylresorcinol O-methyltransferase activity; GO:0008171,O-methyltransferase activity; GO:0046983,protein dimerization activity; GO:0008757,S-adenosylmethionine-dependent methyltransferase activity; GO:0019438,aromatic compound biosynthetic process; GO:0032259,methylation; GO:0003674,molecular_function; GO:0003824,catalytic activity; GO:0008168,methyltransferase activity; GO:00…	PF00891.18:O-methyltransferase domain	--	--	--
Sobic.001G354200.v3.2	0	0.0887	0.1542	12.997	11.9905	8.5028	0	4	6	535	336	342	7.12891	3.6135e-49	1.45006e-47	up	Chr01	64407050	64409426	-	Sobic.001G354200	--	K22440 naringenin 7-O-methyltransferase [EC:2.1.1.232] | (RefSeq) naringenin 7-O-methyltransferase (A)	ko00941: Flavonoid biosynthesis; ko01110: Biosynthesis of secondary metabolites	5-pentadecatrienyl resorcinol O-methyltransferase-like [Sorghum bicolor]	OMT3_SORBI RecName: Full=5-pentadecatrienyl resorcinol O-methyltransferase; EC=2.1.1.n7; AltName: Full=O-methyltransferase 3; Short=SbOMT3;	A0A1B6QMW0_SORBI SubName: Full=Uncharacterized protein {ECO:0000313|EMBL:KXG39256.1};	At4g35160	GO:0102990,5-n-alk(en)ylresorcinol O-methyltransferase activity; GO:0008171,O-methyltransferase activity; GO:0046983,protein dimerization activity; GO:0008757,S-adenosylmethionine-dependent methyltransferase activity; GO:0019438,aromatic compound biosynthetic process; GO:0032259,methylation; GO:0003674,molecular_function; GO:0003824,catalytic activity; GO:0008168,methyltransferase activity; GO:00…	PF00891.18:O-methyltransferase domain	--	--	--
Sobic.001G192200.v3.2	2.0279	1.4083	1.8682	5.2602	5.3788	5.136	110	83	95	283	197	270	1.57687	1.18099e-20	1.51643e-19	up	Chr01	17077365	17085562	+	Sobic.001G192200	--	K05280 flavonoid 3'-monooxygenase [EC:1.14.14.82] | (RefSeq) flavonoid 3'-monooxygenase (A)	ko00941: Flavonoid biosynthesis; ko00944: Flavone and flavonol biosynthesis; ko01100: Metabolic pathways; ko01110: Biosynthesis of secondary metabolites	geraniol 8-hydroxylase [Sorghum bicolor]	C76B6_CATRO RecName: Full=Geraniol 8-hydroxylase; EC=1.14.14.83 {ECO:0000269|PubMed:11718718, ECO:0000269|PubMed:21504162}; AltName: Full=Cytochrome P450 76B6; AltName: Full=Geraniol 10-hydroxylase; Short=CrG10H;	C5WVB4_SORBI SubName: Full=Uncharacterized protein {ECO:0000313|EMBL:EER91355.2};	At2g45570	GO:0005789,endoplasmic reticulum membrane; GO:0016021,integral component of membrane; GO:0102811,geraniol 10-hydroxylase activity; GO:0020037,heme binding; GO:0005506,iron ion binding; GO:0016709,oxidoreductase activity, acting on paired donors, with incorporation or reduction of molecular oxygen, NAD(P)H as one donor, and incorporation of one atom of oxygen; GO:0016099,monoterpenoid biosynthetic…	PF00067.22:Cytochrome P450	--	--	--
Sobic.001G166300.v3.2	0.071	0.1197	0.0505	0.6559	0.6481	0.7078	6	11	4	55	37	58	3.04416	1.06546e-11	7.59464e-11	up	Chr01	13831583	13834521	+	Sobic.001G166300	--	K05278 flavonol synthase [EC:1.14.20.6] | (RefSeq) flavonol synthase/flavanone 3-hydroxylase (A)	ko00941: Flavonoid biosynthesis; ko01100: Metabolic pathways; ko01110: Biosynthesis of secondary metabolites	probable 2-oxoglutarate-dependent dioxygenase At5g05600 [Sorghum bicolor]	JOX2_ARATH RecName: Full=Jasmonate-induced oxygenase 2 {ECO:0000303|PubMed:28559313}; EC=1.14.11.- {ECO:0000269|PubMed:28559313, ECO:0000269|PubMed:28760569, ECO:0000269|PubMed:33516967}; AltName: Full=2-oxoglutarate-dependent dioxygenase JOX2 {ECO:0000305}; AltName: Full=Jasmonic acid oxidase 2 {ECO:0000303|PubMed:28760569};	C5WSA4_SORBI RecName: Full=Fe2OG dioxygenase domain-containing protein {ECO:0000259|PROSITE:PS51471};	At3g19000	GO:0005829,cytosol; GO:0051213,dioxygenase activity; GO:0120091,jasmonic acid hydrolase; GO:0046872,metal ion binding; GO:0097237,cellular response to toxic substance; GO:0009813,flavonoid biosynthetic process; GO:2000022,regulation of jasmonic acid mediated signaling pathway; GO:0080167,response to karrikin; GO:0003674,molecular_function; GO:0003824,catalytic activity; GO:0016491,oxidoreductase …	PF03171.20:2OG-Fe(II) oxygenase superfamily	--	--	--
Sobic.001G035600.v3.2	112.112	95.7035	103.448	244.487	201.227	231.85	4209	3904	3641	9104	5101	8436	1.12541	4.91775e-39	1.44203e-37	up	Chr01	2674768	2676463	+	Sobic.001G035600	--	K01859 chalcone isomerase [EC:5.5.1.6] | (RefSeq) chalcone--flavonone isomerase (A)	ko00941: Flavonoid biosynthesis; ko01100: Metabolic pathways; ko01110: Biosynthesis of secondary metabolites	chalcone--flavonone isomerase [Sorghum bicolor]	CFI_MAIZE RecName: Full=Chalcone--flavanone isomerase; Short=Chalcone isomerase; EC=5.5.1.6;	C5WV22_SORBI RecName: Full=Chalcone-flavonone isomerase family protein {ECO:0000256|RuleBase:RU361158};	At3g55120	GO:0045430,chalcone isomerase activity; GO:0009813,flavonoid biosynthetic process; GO:0003674,molecular_function; GO:0003824,catalytic activity; GO:0016853,isomerase activity; GO:0016872,intramolecular lyase activity; GO:0008150,biological_process; GO:0008152,metabolic process; GO:0009058,biosynthetic process; GO:0009812,flavonoid metabolic process; GO:0071704,organic substance metabolic process;…	PF02431.15:Chalcone-flavanone isomerase	--	--	--

## Sheet: DEMs
Index	Q1 (Da)	Q3 (Da)	Molecular weight (Da)	Formula	Ionization model	Compounds	物质	Class I	物质一级分类	Class II	物质二级分类	CAS	Level	CK-1	CK-2	CK-3	CD-1	CD-2	CD-3	QC01	QC02	QC03	cpd_ID	kegg_map	CK_vs_CD_VIP	CK_vs_CD_P-value	CK_vs_CD_Fold_Change	CK_vs_CD_Log2FC	CK_vs_CD_Type
MWSHY0174	291.086	139.04	290.079	C15H14O6	[M+H]+	Epicatechin	表儿茶素	Flavonoids	黄酮	Flavanols	黄烷醇类	490-46-0	3	133012	108603	70715.7	22807.4	48657.5	58915.6	68822.7	50672.7	60545	C09727	ko00941,ko01100,ko01110	1.02577	0.0577575	0.417443	-1.26035	down
mws0044	303.05	125.02	304.058	C15H12O7	[M-H]-	Taxifolin(Dihydroquercetin)	花旗松素(二氢槲皮素)	Flavonoids	黄酮	Flavanonols	二氢黄酮醇	480-18-2	1	1.56541e+06	1.47452e+06	1.45819e+06	3.48553e+06	3.43929e+06	3.43328e+06	2.33715e+06	2.44641e+06	2.33689e+06	C01617	ko00941,ko01100,ko01110	1.28227	1.91988e-05	2.30276	1.20337	up
pme2960	273.08	153.02	272.068	C15H12O5	[M+H]+	Naringenin chalcone; 2',4,4',6'-Tetrahydroxychalcone*	柚皮素查耳酮*	Flavonoids	黄酮	Chalcones	查耳酮	73692-50-9	1	2.69858e+07	1.49782e+07	1.32493e+07	4.18692e+07	41154195	4.56379e+07	2.77008e+07	2.64868e+07	2.75371e+07	C06561	ko00941,ko01100,ko01110	1.15061	0.0214199	2.33026	1.22049	up
pme3475	273.08	153.02	272.068	C15H12O5	[M+H]+	Butin; 7,3',4'-Trihydroxyflavanone*	紫铆素*	Flavonoids	黄酮	Flavanones	二氢黄酮	492-14-8	1	2.59521e+07	1.54612e+07	1.39718e+07	4.45157e+07	4.56301e+07	4.18772e+07	2.82761e+07	2.80821e+07	2.82046e+07	C09614	ko00941	1.18094	0.0150632	2.38373	1.25322	up
Hajp006320	287.06	153.02	286.048	C15H10O6	[M+H]+	Luteolin (5,7,3',4'-Tetrahydroxyflavone)*	木犀草素*	Flavonoids	黄酮	Flavones	黄酮	491-70-3	1	279833	215823	222392	569187	573623	626990	391433	392653	392587	C01514	ko00941,ko00944,ko01100,ko01110	1.26084	0.000230028	2.46474	1.30143	up
pme1201	273.08	167.03	274.084	C15H14O5	[M-H]-	Phloretin	根皮素	Flavonoids	黄酮	Chalcones	查耳酮	60-82-2	3	349197	332022	319983	791088	777024	903057	502360	497280	499420	C00774	ko00941,ko01110	1.27524	0.00493625	2.4682	1.30346	up
mws0064	287.06	135.05	288.063	C15H12O6	[M-H]-	Eriodictyol (5,7,3',4'-Tetrahydroxyflavanone)	圣草酚	Flavonoids	黄酮	Flavanones	二氢黄酮	552-58-9	3	243556	245239	239984	635783	592031	659216	376885	399775	399657	C05631	ko00941,ko01100,ko01110	1.28126	0.00246083	2.58931	1.37256	up
MWSHY0137	273.08	153.02	272.068	C15H12O5	[M+H]+	Naringenin (5,7,4'-Trihydroxyflavanone)*	柚皮素*	Flavonoids	黄酮	Flavanones	二氢黄酮	480-41-1	1	1.33593e+07	1.32024e+07	1.25449e+07	3.89492e+07	3.87299e+07	4.33241e+07	2.33013e+07	2.29754e+07	2.34064e+07	C00509	ko00941,ko01100,ko01110	1.28082	0.00240022	3.09419	1.62956	up
mws0914	271.06	151	272.068	C15H12O5	[M-H]-	3,5,7-Trihydroxyflavanone (Pinobanksin)	3,5,7-三羟基黄烷酮 (短叶松素)	Flavonoids	黄酮	Flavanonols	二氢黄酮醇	548-82-3	1	6.5459e+06	6.4506e+06	5.60603e+06	1.99543e+07	2.11953e+07	2.23482e+07	1.23941e+07	1.22131e+07	1.23195e+07	C09826	ko00941	1.27833	0.000501688	3.41339	1.77121	up
pme1662	287.09	167.03	286.084	C16H14O5	[M+H]+	5,4'-Dihydroxy-7-methoxyflavanone (Sakuranetin)	5,4'-二羟基-7-甲氧基黄酮 (樱花素)	Flavonoids	黄酮	Flavanones	二氢黄酮	2957-21-3	3	241197	281127	329259	880021	1.04298e+06	1.00977e+06	643785	647820	650540	C09833	ko00941,ko01110	1.26664	0.00115947	3.4439	1.78404	up
MWS20151	271.06	153.02	270.053	C15H10O5	[M+H]+	Apigenin; 4',5,7-Trihydroxyflavone	芹菜素	Flavonoids	黄酮	Flavones	黄酮	520-36-5	1	3.92841e+06	3.96137e+06	3.84453e+06	1.84706e+07	1.90392e+07	2.12981e+07	1.20532e+07	1.19028e+07	1.16962e+07	C01477	ko00941,ko00944,ko01100,ko01110	1.2823	0.00297576	5.01162	2.32528	up
Lmyn006227	269.05	151	270.053	C15H10O5	[M-H]-	Galangin (3,5,7-Trihydroxyflavone)	高良姜素	Flavonoids	黄酮	Flavones	黄酮	548-83-4	3	5.9885e+06	4.97428e+06	5.28488e+06	2.7242e+07	2.78601e+07	3.02569e+07	1.66807e+07	1.67909e+07	1.66789e+07	C10044	ko00941	1.28046	0.000624551	5.25361	2.39331	up
Lmzp002365	465.14	303.09	464.132	C22H24O11	[M+H]+	Hesperetin-7-O-glucoside	橙皮素-7-O-葡萄糖苷	Flavonoids	黄酮	Flavanones	二氢黄酮	31712-49-9	2	9	9	9	1.69282e+06	925113	1.99957e+06	1.78499e+06	1.85424e+06	696514	C16422	ko00941	1.2832	0.0405009	171019	17.3838	up
